# 1 **A causal role for estradiol in human reinforcement learning**

2

## 3 **Authors**

4 Sebastijan Veselic<sup>1,2,3\*</sup>, Gerhard Jocham<sup>4</sup>, Christian Gausterer<sup>5</sup>, Bernhard Wagner<sup>6</sup>, Miriam  
5 Ernhoefer-Reßler<sup>6</sup>, Rupert Lanzenberger<sup>7</sup>, Claus Lamm<sup>1,8</sup>, Christoph Eisenegger<sup>1</sup> & Annabel  
6 Losecaat Vermeer<sup>1\*</sup>

7

## 8 **Affiliations**

9 <sup>1</sup> Neuropsychopharmacology and Biopsychology Unit, Department of Cognition, Emotion,  
10 and Methods in Psychology, Faculty of Psychology, University of Vienna, Austria

11 <sup>2</sup> Department of Clinical and Movement Neurosciences, University College London, London,  
12 UK

13 <sup>3</sup> Wellcome Centre for Human Neuroimaging, University College London, London, UK

14 <sup>4</sup> Biological Psychology of Decision Making, Institute of Experimental Psychology, Heinrich  
15 Heine University Düsseldorf, Germany

16 <sup>5</sup> FDZ-Forensisches DNA Zentrallabor GmbH, Medical University of Vienna, Austria

17 <sup>6</sup> Laboratory for Chromatographic & Spectrometric Analysis, FH JOANNEUM, Graz, Austria

18 <sup>7</sup> Department of Psychiatry and Psychotherapy, Medical University of Vienna, Vienna,  
19 Austria,

20 <sup>8</sup> Vienna Cognitive Science Hub, University of Vienna, Austria

21

22

23 (\*) corresponding authors: Sebastijan Veselic (*sebastijan.veselic.18@ucl.ac.uk*) and  
24 Annabel Losecaat Vermeer (*annabel.losecaat.vermeer@univie.ac.at*)

## 25 **Abstract**

26 The sex hormone estrogen is hypothesized to play a key role in human cognition via its  
27 interactions with the dopaminergic system. Work in rodents has shown that estrogen's most  
28 potent form, estradiol, impacts striatal dopamine functioning predominately via increased D1-  
29 receptor signalling, while human work has suggested that high estradiol levels are associated  
30 with altered reward sensitivity. Here, we addressed two fundamental questions: 1) whether  
31 estradiol causally alters reward sensitivity in men, and 2) whether this effect of estradiol is  
32 moderated by individual variation in polymorphisms of dopaminergic genes. To test this, we  
33 performed a double-blind placebo-controlled administration study in which hundred men  
34 received either a single dose of estradiol (2 mg) or placebo. We found that estradiol  
35 administration increased reward sensitivity, which was moderated by baseline dopamine. This  
36 was observed in choice behaviour and increased learning rates. These results confirm a  
37 causal role of estradiol in reinforcement learning in men that is moderated by the striatal  
38 dopaminergic pathway.

39

40 **Keywords:** *Estradiol, reward processing, reinforcement learning, DAT1, COMT, Estrogen*  
41 *receptor*

## 42 Introduction

43 Learning which action to select based on whether the outcome of that action is rewarded or  
44 not is a fundamental capacity required for adaptive behaviour. One neuromodulator that has  
45 long been linked to this capacity, known as reinforcement learning (RL), is dopamine <sup>1</sup>. More  
46 recently, an additional biological substrate that has been suggested to influence RL via  
47 dopaminergic mechanisms is estrogen <sup>2</sup>.

48 Estrogens are a class of steroid hormones important for healthy development, with  
49 estradiol being the most prevalent and potent form <sup>3,4</sup>. Estradiol has gained traction as a  
50 compound that may impact human reward processing by amplifying dopamine signalling via  
51 the D1 receptor <sup>2</sup>. The evidence for this hypothesis comes from two lines of work. From human  
52 work, we know that fluctuations in circulating estradiol levels are correlated with differences in  
53 midbrain BOLD responses, a key area where dopamine is released <sup>5-7</sup>. Furthermore, a recent  
54 administration study in women showed that increased salivary estradiol levels led to larger  
55 reward prediction errors in the nucleus accumbens <sup>8</sup>. From rodent work, we know that  
56 manipulating estradiol levels affects the striatal dopamine system in various ways that are best  
57 characterised as a net increase in overall dopamine signalling predominantly via the D1  
58 receptor <sup>9-14</sup>.

59 If increased estradiol levels in humans influence reward processing by increasing  
60 reward sensitivity through amplified dopamine signalling via the D1 receptor, then it should be  
61 possible to relate its effects to that of dopamine in RL <sup>1,15-17</sup>. Within this field, dopamine agonists  
62 and antagonists are often administered to better understand the mechanistic role of dopamine  
63 in RL <sup>18-24</sup>. Complementing it with pharmacogenetics, where the effect of genetic variation on  
64 the administered drug is considered, has refined our understanding of their relationship <sup>19,22,25-</sup>  
65 <sup>27</sup>. That is, causally manipulating dopamine levels in humans affects performance in RL tasks<sup>27</sup>  
66 with these effects depending on individual differences in baseline dopamine levels <sup>18</sup>.

67 Two key polymorphisms that lead to variation in baseline dopamine levels by impacting  
68 dopamine synthesis capacity and transmission are the dopamine transporter (DAT1) and

69 catechol-O-methyltransferase (COMT) gene <sup>19,24,25</sup>. Variation in the VNTR polymorphism of  
70 DAT1 and the val<sup>158</sup>met polymorphism of COMT correlates with performance on working  
71 memory and RL in humans <sup>19,24,25,28,29</sup>. Therefore, if estradiol influences reward processing  
72 through dopaminergic mechanisms, then variation in the DAT1 and COMT genotype should  
73 moderate the effect of estradiol. Furthermore, we would predict it should be moderated by  
74 traits related to human reward sensitivity such as the ones measured by the BIS/BAS  
75 questionnaire <sup>30-33</sup>.

76         Despite abundant evidence from rodent research showing a clear relationship between  
77 estradiol and dopamine, evidence in humans have been less conclusive. Namely, it has been  
78 shown that high endogenous estradiol levels were associated with increased <sup>5,7</sup> as well as  
79 decreased <sup>34</sup> performance on a variety of cognitive tasks that may have recruited different  
80 neural mechanisms. Thus, it remains unclear whether administering estradiol influences  
81 reward processing as would be expected by amplified D1-receptor signalling. Furthermore,  
82 although previous work on humans provided important insights, it had certain shortcomings  
83 such as small sample sizes, correlational study designs, and a lack of accounting for baseline  
84 differences in dopamine; for exceptions see <sup>8,34,35 25,36</sup>. All studies thus far have also focussed  
85 on female samples who have, on average, higher endogenous levels of estradiol compared  
86 to men <sup>37</sup>. These aspects are important for being able to establish a more precise role of  
87 estradiol in human reward processing which, therefore, remains an open question (for review  
88 see <sup>2</sup>).

89         The aim of the present pharmacogenetic study was to address these gaps and  
90 investigate whether estradiol administration increases reward sensitivity in men and whether  
91 this effect is moderated by baseline differences in dopamine. To test this, we used a  
92 probabilistic RL task (Fig. 1A) where subjects had to choose between two options on each trial  
93 in order to maximize their earnings. Moreover, we aimed at providing a more conclusive and  
94 precise account of a dopamine-dependent basis of action through excluding several other  
95 candidate explanations (i.e. gene polymorphisms) that could have given rise to the obtained  
96 results and have so far been unaddressed in the literature (see Supplementary Materials).

97 We hypothesized that estradiol administration would influence reward processing by  
98 increasing reward sensitivity observed through subjects' choice behaviour<sup>8</sup>. We further  
99 predicted this would be revealed through computational modelling. Finally, we predicted that  
100 the behavioural and computational effects would be moderated by the DAT1 polymorphism,  
101 as observed in previous dopamine administration work<sup>19,26</sup>.

102

## 103 **Methods and materials**

### 104 **Subjects**

105 We tested one hundred healthy young men between 19 and 34 years ( $M_{age} = 24.86$ ,  $SD =$   
106  $3.53$ ) with a body mass index (BMI) between 19.3 and 31.5 ( $M = 24.45$ ,  $SD = 2.86$ ). Our  
107 screening procedure was based on previous work where pharmacokinetic data for a single 2  
108 mg estradiol dose in topical form was obtained<sup>38</sup>. Our sample size was in line with previous  
109 recommendations for the field<sup>2</sup>. The study procedure was performed in accordance with the  
110 Declaration of Helsinki and approved by the Medical Ethics Committee of the University of  
111 Vienna (1918/2015).

### 112 **Measurement Instruments**

#### 113 **Questionnaires**

114 We assessed self-reported mood (German Multidimensional Mood State Questionnaire;  
115 MDBF<sup>39</sup>), individuals' impulsiveness (Barratt Impulsiveness Scale; BIS-11<sup>40</sup>), and behavioural  
116 activation and inhibition (BIS/BAS<sup>41</sup>). Both BIS/BAS and BIS-11 scores have been previously  
117 found to correlate with reward learning<sup>42–45</sup> with the BIS/BAS specifically being related to  
118 reward sensitivity<sup>30,31</sup>. In addition, we probed subjects' beliefs about estradiol (e.g. whether  
119 they believed they received estradiol or a placebo, how certain they were about their belief,  
120 and whether they had noticed any subjective changes).

121

## 122 **Hormone concentrations**

123 We collected hormone samples via passive drool and stored them at -30 degrees Celsius.  
124 Saliva samples were analyzed for estrone and estradiol using gas chromatography tandem  
125 mass spectrometry (GC-MS/MS) and hydrocortisone including testosterone with liquid  
126 chromatography tandem mass spectrometry (LCMS/MS).

## 127 **Genotyping**

128 We collected DNA using sterile cotton buccal swabs (Sarstedt AG, Germany) and extracted it  
129 by applying the QIAamp DNA Mini kit (Qiagen, Germany). Repeat length polymorphisms  
130 (AR(CAG), AR(GGN), DAT1(VNTR), ER $\alpha$ (TA) and ER $\beta$ (CA)) were investigated by PCR with  
131 fluorescent-dye-labeled primers and capillary electrophoresis. The single base primer  
132 extension (SBE) method also known as minisequencing was applied for the typing of single  
133 nucleotide polymorphism (SNP) variants (Val158Met) in the COMT gene.

## 134 **Experimental Tasks**

135 **Reinforcement Learning:** We used a well-established probabilistic reinforcement learning  
136 task with two options<sup>17</sup>. The task consisted of 500 trials, with a 10 second pause after the first  
137 250 trials. There was no choice time-out. The two options had independently varying reward  
138 probabilities generated by Gaussian random walks (Fig. 1). Importantly, both options could be  
139 correct (i.e. rewarding – yellow frame) or incorrect (i.e. non-rewarding – reward frame) on any  
140 trial. Subjects received feedback for the chosen (thick frame) and unchosen (thin frame)  
141 option. Each correct choice was rewarded with 5 eurocents and added to their cumulative  
142 balance. Subjects also saw a bar fill up as they chose the correct option. Once the bar filled  
143 up, a 1 € coin was presented next to the bar indicating they had added 1 € to their cumulative  
144 balance.

145 **Working memory capacity:** We used an adapted version of the standard N-BACK task<sup>25</sup>  
146 with four conditions in total (0-BACK, 1-BACK, 2- BACK, 3-BACK). Each condition block had  
147 20 trials which included 20% target, 65% nontarget, and 15% lure trials. Subjects were

148 presented with a sequence of letters one-by-one. For each letter, they had to decide if the current  
149 letter was the same as the one presented  $N$  trials ago by pressing “R”, in case it was not the  
150 same they had to press “O”.

## 151 **Procedure**

152 Subjects screened for BMI, a history of psychiatric disorders, concurrent involvement in other  
153 psychopharmacological studies, and chronic physical injuries, arrived to the lab on two  
154 separate days. On the first session, at 4.00 pm, we collected subjects' responses on a battery  
155 of questionnaires, their DNA with a buccal swab for genotyping, and measured their BMI and  
156 body fat using a body composition monitor (Omron BF51).

157 On the second session (Fig. 1, timeline) after obtaining consent, subjects filled out the  
158 MDBF-A, BIS-11, and BIS/BAS. Twenty minutes after arrival, we obtained the first saliva  
159 sample (T1) to assess baseline hormone concentrations, followed by the N-BACK task. They  
160 were randomly assigned estradiol or placebo in a double-blind manner and self-administered  
161 a topical transparent gel containing either 2 mg of estradiol or a placebo. We waited two hours  
162 to allow estradiol levels to peak based on a previously established procedure <sup>38</sup>. Fifteen  
163 minutes prior to the behavioural testing, subjects filled out MDBF-B, BIS-11, and provided a  
164 second saliva sample (T2).

165 The first behavioural task was the probabilistic reinforcement learning task, followed  
166 by three other tasks that were not the focus of this publication. After the behavioural testing,  
167 we probed subjects' beliefs about the treatment and the tasks. At the end of the study, each  
168 subject was paid in accordance to their performance.

169

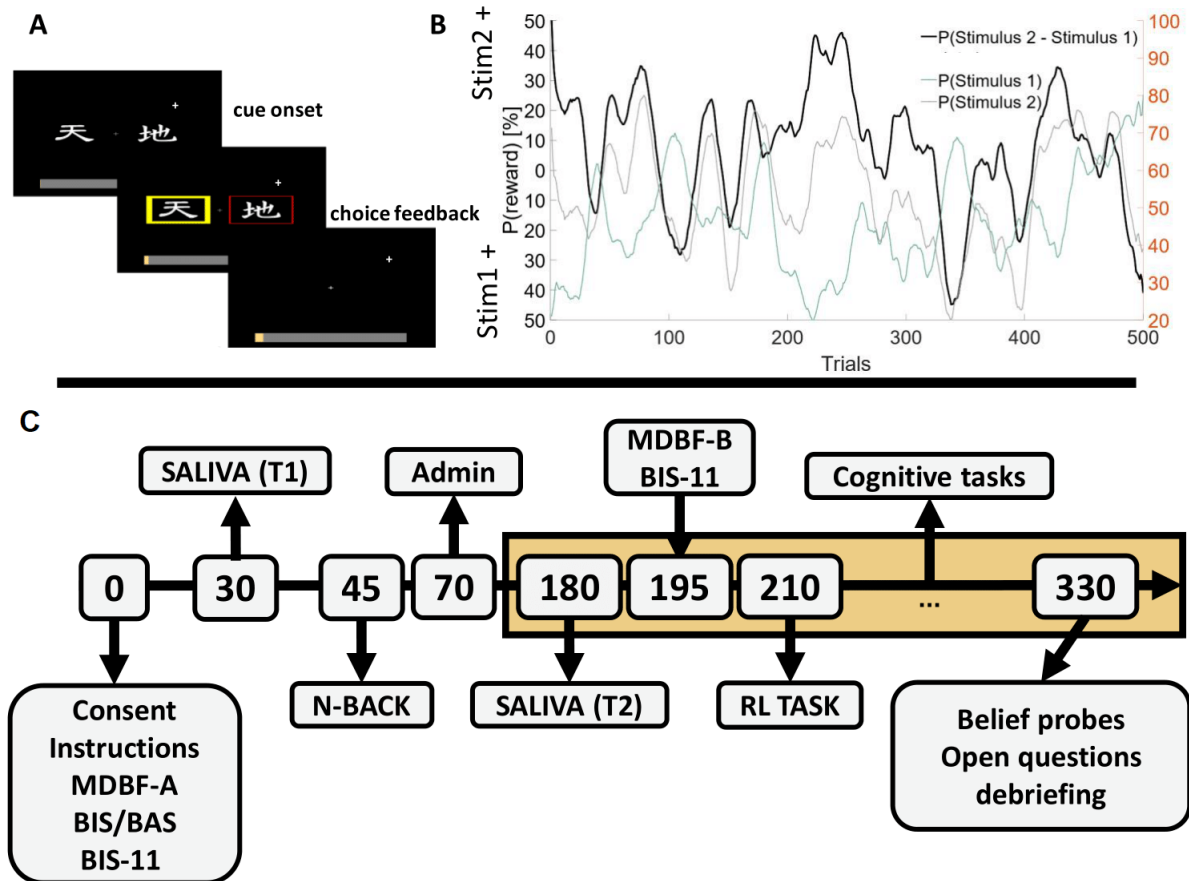

170

171 **Fig. 1 A)** Outline of a trial of the RL task. Each trial started by the presentation of two options (henceforth  
 172 option A and option B). Subjects were required to choose one of these options. After they made a  
 173 choice, subjects were presented with feedback, with the chosen option indicated by a thicker frame and  
 174 the not chosen option by a thinner frame. A yellow frame indicated the rewarded option, whereas a red  
 175 frame indicated the unrewarded option. Importantly, both options A and B could yield a reward or no  
 176 reward on the same trial. **B)** The probability of reward upon choice for each option (green and gray  
 177 lines), which were determined by two independent random Gaussian walks, with the probability shown  
 178 in percent on the right y-axis in orange. The black line shows the relative probability of reward for one  
 179 option over the other, which corresponds to the difference in reward probability for option A and option  
 180 B. On trials where the black line is reaching the top half of the y-axis, option A was more rewarding, and  
 181 vice versa. **C)** The timeline of the test session. Values in brackets denote minutes from the onset of the  
 182 test session. We first collected consent and questionnaire data, which was followed by a baseline saliva  
 183 sample (T1) and the N-BACK task. After administration of estradiol or placebo, subjects were required  
 184 to rest for two hours before we collected the second saliva sample (T2) and assessed subjects' mood  
 185 and impulsivity via questionnaires. The RL task began 120 minutes post-administration. This was  
 186 followed by three other cognitive tasks that are not the focus of the current paper. At the end of the test  
 187 session, we probed subjects' beliefs about the drug, the experiment, and debriefed them.

188

189

190

191

192

193

194



195 **Statistical analysis**

196 **Behavioural analysis**

197 To determine the effect of estradiol on choice behaviour, we examined the cumulative  
198 difference in the options subjects chose and the percentage of trials on which there was a  
199 significant difference in the chosen option. As a measure of family-wise error control, we used  
200 permutation testing and Fisher-z-transformations.

201 We also computed choice accuracy because we predicted that if estradiol would  
202 influence reward processing by increasing reward sensitivity, this would result in increased  
203 accuracy and be moderated by differences in striatal dopamine functioning (i.e. through the  
204 DAT1 genotype)<sup>26</sup>. Due to the same reasoning we computed how many trials subjects would  
205 pick the same option if they were rewarded for that option on trial  $t$  (staying). Accuracy and  
206 staying were statistically evaluated with general linear models.

207 In addition to the above metrics, we computed subjects' choice autocorrelation. With  
208 this, we tested our hypothesis that increased reward prediction errors would, by definition,  
209 upregulate saliency of recent events<sup>8</sup>. Behaviourally, this would mean subjects' recent  
210 choices should influence what they will choose next more. We computed the relative  
211 contribution of choices made from  $n - 1$  to  $n - 7$  trials back (lags) on the current choice. We  
212 then compared the relative contribution of all previous choices (pure choice autocorrelation)  
213 and specifically choices when they were rewarded (choice autocorrelation as a function of  
214 reward). We then performed independent samples  $t$ -tests on individual lags that were z-scored  
215 within subject to assess statistical significance.

216 **Computational modelling**

217 To account for behaviour within a computational framework and relate our findings to the field  
218 exploring dopamine and its role in RL, we used computational modelling. We fit a series of Q-  
219 learning models with softmax choice rules. The winning model included a learning rate for  
220 positive and negative prediction errors, a temperature parameter, and an irreducible noise

221 parameter (see Supplementary materials for model selection and parameter recovery). Our  
222 main hypothesis was that if estradiol would increase reward sensitivity, that should be  
223 captured by the learning rate, reflecting how strongly new information will be weighed and  
224 incorporated into the subjects' subjective values.

225

## 226 **Results**

227 Our sample was matched for age, height, visceral, and abdominal fat, BMI, working memory,  
228 self-reported impulsivity, behavioural inhibition and approach, and mood. As a manipulation  
229 check of our administration protocol, estradiol concentrations were significantly elevated in  
230 subjects who had received estradiol compared to placebo after ( $W = 1545$ , 95% CI [0.03,  
231 1.87],  $p < .05$ ), but not before administration (baseline:  $W = 1498$ , 95% CI [-0.05, 1.03],  $p =$   
232 .09) and subjects' beliefs about whether they had received estradiol or placebo did not  
233 correlate with the actual received drug ( $r = 0.02$ ,  $p = .82$ ; for further details see Supplementary  
234 Materials).

### 235 **Estradiol administration increases reward sensitivity**

236 Our first hypothesis was that estradiol administration would increase reward sensitivity.  
237 Because reward size was kept constant, the only difference across trials was whether a choice  
238 was rewarded or not. Therefore, we predicted that increased reward sensitivity would be  
239 reflected in a systematic difference in the options subjects would choose across trials  
240 compared to placebo. To test this, we computed the average probability per group to select  
241 option A/B (i.e. expected chosen option) on each trial (Fig. 2A), subtracted these traces from  
242 each other, and plotted the cumulative choice difference across trials (Fig. 2B).

243 The cumulative choice difference in the expected chosen option between both groups  
244 surpassed what would be expected by chance. This was tested by comparing the above  
245 results to the 99.9<sup>th</sup> percentile of a null distribution (see Methods and materials) indicating  
246 what would be expected by chance ( $M_{\text{last trial}} = 53.48\%$ ,  $z_{\text{last trial}} = 8.44$ ,  $p < .001$ , threshold for

247 99.9<sup>th</sup> percentile of the null: 46.20 %, Fig. 2B). The observed cumulative choice difference  
248 remained significant when collapsed across time ( $M = 25.72 \pm 0.69\%$ ,  $z = 5.80$ ,  $p < .001$ ,  
249 threshold for 99.9<sup>th</sup> percentile of the null:  $M = 21.02$  %, Fig. 2C). When we traced trials that  
250 contributed most to the cumulative difference, we observed a statistically significant difference  
251 in what both groups chose on 7.6 % of trials (black dots in Fig. 2A). In other words, estradiol  
252 administration caused subjects to choose a different option on 7.6 % of trials as compared to  
253 placebo ( $z = 5.37$ ,  $p < .001$ , threshold for 99.9<sup>th</sup> percentile of null distribution: 6.4 %).

254           However, estradiol administration did not only increase reward sensitivity in choice  
255 behaviour as described above. When subjects rated how strongly they observed the changing  
256 of reward probabilities of both options throughout the task on a scale from 1 to 100 during  
257 debriefing, those receiving estradiol explicitly reported that they observed reward probabilities  
258 across trials to change more strongly ( $t_{(78.495)} = 2.15$ , 95%  $CI = [0.855, 22.61]$ ,  $p = 0.035$ ,  $d =$   
259 0.48,  $BF_{10} = 3.28$ ).

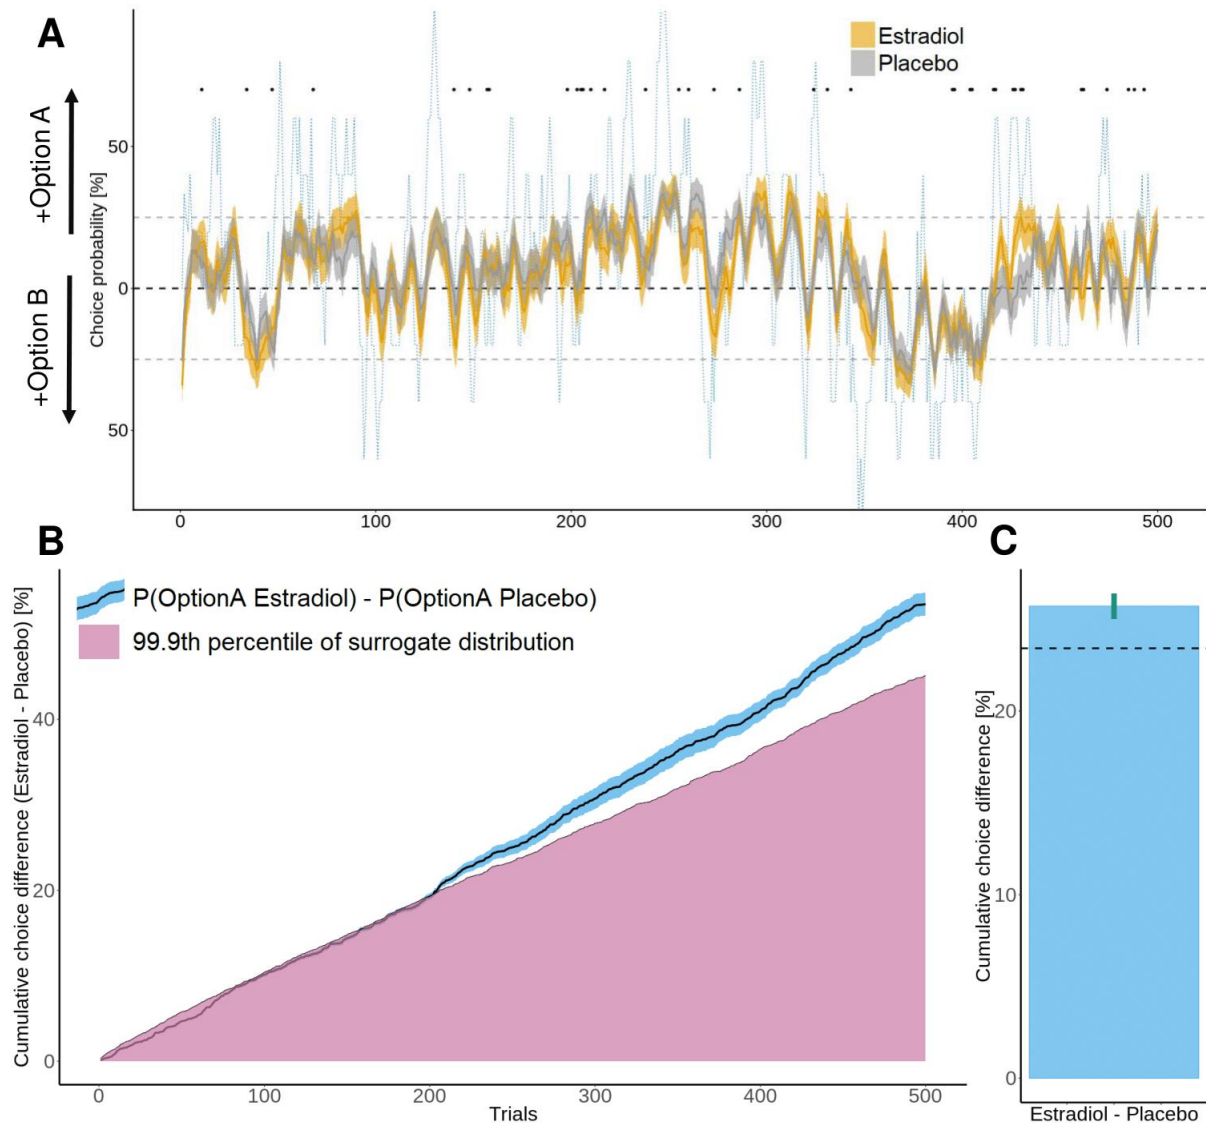

260

261 **Fig. 2 A)** Relative choice probability for choosing option A (top of y-axis) vs. choosing option B (bottom  
 262 of y-axis) for the estradiol (orange) and placebo (gray) group. Solid thick lines represent trial mean,  
 263 shaded areas around the thick lines denote standard errors of the mean. The blue dotted line denotes  
 264 the relative reward probability which was computed from the probability of option A (top of y-axis) minus  
 265 probability of option B (bottom of y-axis). Horizontal gray dotted lines represent where subjects were on  
 266 average 25% more likely to select option A (upper line) or option B (lower line). All time-series traces  
 267 were smoothed with a 5-trial moving average for visual purposes. The black dots indicate trials where  
 268 there was a statistically significant difference ( $p < .05$ ) between the estradiol and placebo group. The  
 269 number of significant trials was compared to a null distribution (see Methods and materials). **B)**  
 270 Cumulative choice difference between the estradiol and placebo group over trials compared to the  
 271 99.9th<sup>th</sup> percentile null distribution. The thick black line is the difference between the orange and gray  
 272 lines presented in figure **A**, and the blue shaded area is the corresponding difference between the  
 273 standard errors in **A**. The dark orange area denotes the space in which differences are not significant.  
 274 Conversely, separation between the lines indicate statistical significance. **C)** Mean cumulative choice  
 275 difference between the estradiol and placebo group collapsed across trials. The dashed line represents  
 276 the mean cumulative choice difference of the 100<sup>th</sup> percentile of the null distribution. Error bars indicate  
 277 standard error of the mean.

278

279 **Estradiol's improvement in accuracy is moderated by DAT1 genotype and**  
280 **reward responsiveness**

281 Following the observed systematic choice difference between both groups, we investigated  
282 whether this was reflected in group differences in accuracy. Both groups were equally accurate  
283 ( $M_{Estradiol} = 57.30 \pm 6.91$ ,  $M_{Placebo} = 56.80 \pm 7.09$ ,  $t_{(97.94)} = 0.36$ ,  $p = .72$ , Fig. 3A), and responded  
284 equally fast ( $M_{Estradiol} = 0.61 \text{ sec} \pm 0.11$ ,  $M_{Placebo} = 0.62 \text{ sec} \pm 0.09$ ,  $t_{(95.55)} = 0.46$ ,  $p = .65$ ).

285 However, we predicted that the effect of estradiol on accuracy will be moderated by  
286 individual differences in baseline striatal dopamine, as other work has shown interactive  
287 effects between task performance and dopamine-related genes<sup>18,46</sup>. In our study, we used the  
288 DAT1 polymorphism as an index of striatal dopamine with the 9/10 and 10/10 genotypes being  
289 associated with high and low striatal dopamine, respectively<sup>47</sup>.

290 A general linear model revealed an interaction between drug administration and DAT1  
291 genotype on accuracy ( $F_{(1, 69)} = 4.10$ ,  $p = .047$ ,  $\Omega^2 = 0.037$ , Fig. 3B) while controlling for  
292 covariates (see Supplementary Materials). Pairwise comparisons revealed that estradiol  
293 administration increased accuracy in subjects with the 9/10 genotype (i.e. high striatal  
294 dopamine levels;  $M = 60.00 \pm 5.36$ ) compared to those with a 10/10 genotype (i.e. low striatal  
295 dopamine levels; 10/10 DAT1,  $M = 56.00 \pm 6.51$ ;  $t_{(39.60)} = 2.14$ , 95% CI [0.21, 7.63],  $p = .04$ ,  $d$   
296  $= 0.66$ ,  $BF_{10} = 3.16$ ), while this difference did not exist in the placebo group (9/10 genotype:  $M$   
297  $= 57.21 \pm 6.60$ ; 10/10 genotype:  $M = 56.90 \pm 6.34$ ;  $t_{(30.01)} = 0.15$ ,  $p = .88$ ). However, estradiol  
298 administration did not improve accuracy in subjects with the 9/10 genotype relative to placebo  
299 (9/10:  $t_{(28.48)} = 1.35$ ,  $p = .19$ ; 10/10:  $t_{(40.11)} = 1.79$ , 95% CI [-0.41, 6.77],  $p = .08$ ,  $d = 0.55$ ,  $BF_{10}$   
300  $= 1.92$ ).

301 We also predicted that the effect of estradiol would be moderated by subjects' traits  
302 related to reward responsiveness such as the one measured by BIS/BAS<sup>30,31,33</sup>. Indeed, when  
303 we accounted for subjects' reward responsiveness (Fig 3C), we found that those who received  
304 estradiol (vs. placebo) were more accurate ( $\beta = 24.17 \pm 11.14$ ,  $F_{(1, 85)} = 4.7$ ,  $p = 0.03$ ,  $\Omega^2 =$

305 0.008), which was further moderated by reward responsiveness ( $F_{(1, 85)} = 4.6, p = 0.03, \Omega^2 =$   
306 0.036) while controlling for covariates. That is, estradiol enhanced accuracy specifically in  
307 subjects who were less reward responsive ( $r = -0.52, p < .001$ ) with no such correlation in the  
308 placebo group ( $r = -0.16, p = 0.27$ ). This result further supports the hypothesis that estradiol  
309 administration increased reward sensitivity by enhancing striatal reward prediction errors that  
310 increased the saliency of each trial<sup>8</sup>. In our task, this hypothesis would predict more reward  
311 responsive subjects to switch between the choice options more frequently. Indeed, we found  
312 that within the estradiol group, there was a significant positive correlation between reward  
313 responsiveness and switching ( $r = 0.37, p = 0.009$ ) that was only trending in subjects who  
314 received placebo ( $r = 0.26, p = 0.07$ ). Importantly, the degree of switching negatively predicted  
315 subjects' task accuracy ( $F_{(1, 98)} = 69.38, p < .001, \Omega^2 = 0.41$ ) across both groups, explaining  
316 why more reward responsive subjects who received estradiol were less accurate.

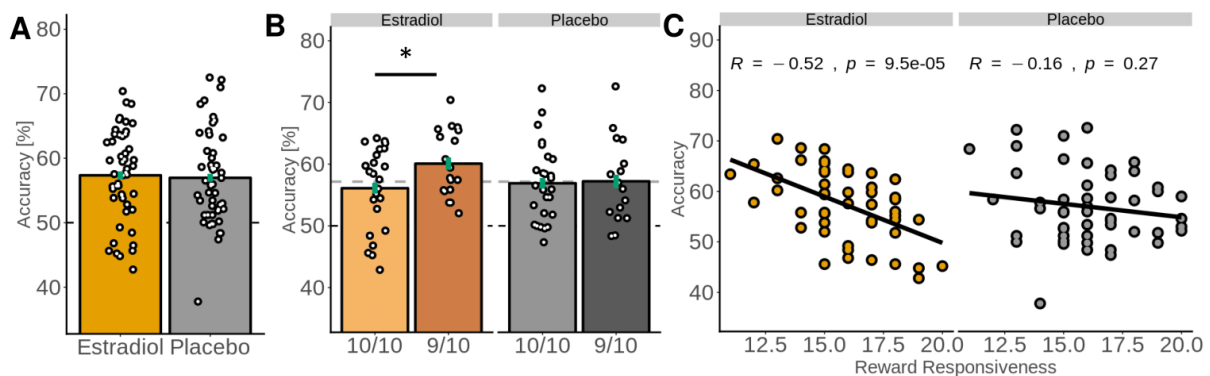

317

318 **Fig. 3 A)** Mean accuracy split according to drug administration. **B)** Mean accuracy split according to  
319 drug administration and DAT1 polymorphism. **C)** Accuracy was moderated by reward responsiveness.  
320 Green error bars are standard errors of the mean. Dots represent individual subjects. The horizontal  
321 dotted line represents grand mean performance collapsed across groups to show the relative change  
322 for individual subgroups. \*  $p < .05$

323

### 324 **Increased reward sensitivity is observed in increased learning rates**

325 Given our observation that estradiol increased reward sensitivity (Fig. 2), the interactive effect  
326 with DAT1 and reward responsiveness (Fig. 3), and our hypothesis that the differences in  
327 choice behaviour might occur due to upregulated striatal prediction errors, we predicted that

328 estradiol would enhance the learning of reward probabilities. In a RL framework this would be  
329 reflected in increased learning rates.

330 To compare learning rates we used the maximum a posteriori estimates of the winning  
331 model fitted in a hierarchical Bayesian way <sup>48</sup>, which included separate learning rates for  
332 positive and negative prediction errors, a temperature parameter, and an irreducible noise  
333 parameter (see Supplementary Materials for details on model selection and parameter  
334 recovery).

335 This model revealed that estradiol administration increased the learning rates for  
336 positive and negative prediction errors compared to placebo ( $\alpha_{\text{Positive}}$ :  $M_{\text{Estradiol}} = 0.47 \pm 0.22$ ,  
337  $M_{\text{Placebo}} = 0.37 \pm 0.24$ ,  $t_{(97.51)} = 2.36$ , 95% CI [0.017, 0.19],  $p = .02$ ,  $d = 0.47$ ,  $BF_{10} = 4.77$ ;  $\alpha_{\text{Negative}}$ :  
338  $M_{\text{Estradiol}} = 0.45 \pm 0.31$ ,  $M_{\text{Placebo}} = 0.27 \pm 0.25$ ,  $t_{(93.55)} = 3.2$ , 95% CI [0.068, 0.29],  $p = .002$ ,  $d =$   
339 0.64,  $BF_{10} = 35.03$ , Fig. 4A). We also compared both parameters by computing 95% Highest  
340 Density Interval estimates <sup>49</sup> (Fig. 4D) with stronger evidence in favour of the negative learning  
341 rate 95% HDI [0.04, 0.39] being higher in subjects who received estradiol compared to the  
342 positive learning rate 95% HDI [-0.04, 0.32]. Contrary to our expectations, the observed main  
343 effect of estradiol was not moderated by the DAT1 polymorphism in case of either learning  
344 rate ( $\alpha_{\text{Positive}}$ :  $F_{(1, 80)} = 0.24$ ,  $p = .89$ ,  $\alpha_{\text{Negative}}$ :  $F_{(1, 80)} = 0.12$ ,  $p = .73$ ).

345 Finally, to provide construct validation for the obtained parameters, we correlated them  
346 with the BIS/BAS Drive subscale measuring motivation for goal-directed behaviour <sup>40</sup>. We  
347 found that both positive and negative learning rates were weakly correlated in subjects who  
348 received estradiol ( $\alpha_{\text{Positive}}$ :  $r = 0.3$ ,  $p = 0.03$ ,  $\alpha_{\text{Negative}}$ :  $r = .27$ ,  $p = 0.06$ ) but not who received  
349 placebo ( $\alpha_{\text{Positive}}$ :  $r = -0.10$ ,  $p = 0.47$ ,  $\alpha_{\text{Negative}}$ :  $r = -.09$ ,  $p = 0.53$ ).

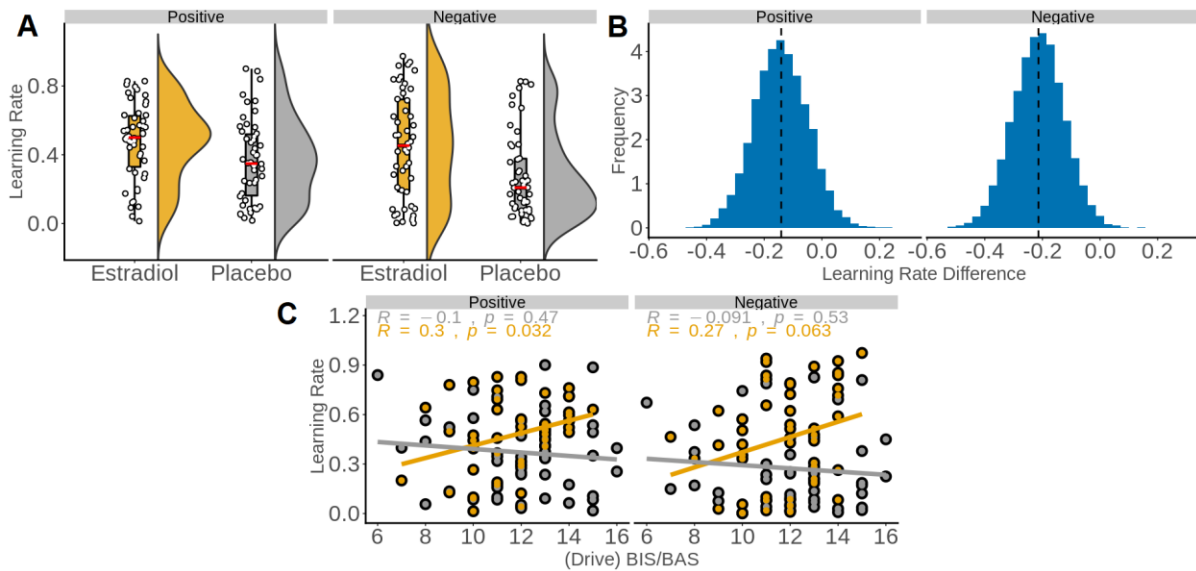

350

351 **Fig. 4 A)** Learning rates by drug treatment. Individual dots represent subjects. The red bar represents  
 352 the median, the box plot represents 75% of data, with the whiskers representing 1.95\*IQR. **B)** 95%  
 353 highest density interval (HDI) estimates for learning rate differences between both groups. **C)**  
 354 Correlation between both learning rates and the drive subscale of BIS/BAS measuring motivation for  
 355 goal-directed behaviour.

356

357 **Increased reward sensitivity is driven by differences in stay decisions, choice**  
 358 **autocorrelation, and is moderated by the DAT1 genotype**

359 Finally, to more precisely understand the observed difference in choice behaviour between  
 360 both groups and DAT1 genotype, we tested whether these differences could be attributed to  
 361 differences in staying behaviour and choice autocorrelation<sup>24,50</sup>.

362 As would be predicted by increased accuracy in the 9/10 DAT genotype subjects, on  
 363 average these subjects also chose the same option more often after being rewarded for this  
 364 option before ( $M = 1.79 \pm 0.18$ ; Fig. 5A). This was true when comparing them to subjects with  
 365 placebo who had the 9/10 genotype ( $M = 1.63 \pm 0.22$ ;  $t_{(29.05)} = 2.33$ , 95% CI [0.02, 0.3],  $p =$   
 366  $.03$ ,  $d = 0.80$ ,  $BF_{10} = 5.01$ ), and when comparing them to subjects who had the 10/10 genotype  
 367 (placebo:  $t_{(41.61)} = 2.22$ , 95% CI [0.01, 0.27],  $p = .03$ ,  $d = 0.66$ ,  $BF_{10} = 3.34$ ; estradiol: ( $t_{(38.86)} =$   
 368  $2.49$ , 95% CI [0.03, 0.27],  $p = .02$ ,  $d = 0.64$ ,  $BF_{10} = 5.95$ ). In contrast, this difference was not  
 369 observed between both drug groups when not accounting for differences in DAT1 genotype  
 370 ( $t_{(97.94)} = 1.10$ ,  $p = 0.28$ ). In other words, the increase in accuracy by exogenously elevated



371 estradiol in individuals with a 9/10 genotype was reflected in increased decisions to stay with  
372 options for which they were previously rewarded.

373         We then extended this metric by examining how subjects' previous choice impacted  
374 their current choice. We observed that estradiol administration caused subjects to weigh their  
375 choice on the previous trial ( $n - 1$ ) more heavily compared to placebo (Fig. 5B), both when that  
376 choice was rewarded ( $t_{(97)} = 2.61$ , 95% *CI* [0.073, 0.538],  $p = 0.01$ ,  $d = 0.52$ ,  $BF_{10} = 8.07$ ) and  
377 irrespective of the outcome ( $t_{(97)} = 2.21$ , 95% *CI* [0.034, 0.639],  $p = .03$ ,  $d = 0.44$ ,  $BF_{10} = 3.49$ ).  
378 However, we also observed a decrease in the weight of previous rewarded choices occurring  
379 more than one trial ago ( $n - 4$ ) ( $t_{(97)} = 2.59$ , 95% *CI* [0.064, 0.482],  $p = 0.01$ ,  $d = 0.52$ ,  $BF_{10} =$   
380 7.93). In other words, while recent rewarded choices carried more weight, choices that were  
381 rewarded further in the past carried less weight, which is in line with having higher learning  
382 rates compared to the placebo group.

383         When we further split this analysis according to the DAT1 genotype (Fig. 5C), we  
384 observed similar results to the ones reported above. Estradiol administration enhanced the  
385 weight of the last choice ( $n - 1$ ) on the current choice in the 9/10 subgroup ( $t_{(32)} = 2.12$ , 95%  
386 *CI* [0.022, 1.027],  $p = .04$ ,  $d = 0.73$ ,  $BF_{10} = 3.44$ ) while this was not the case in the 10/10  
387 subgroup ( $t_{(48)} = 1.51$ ,  $p = .14$ ).

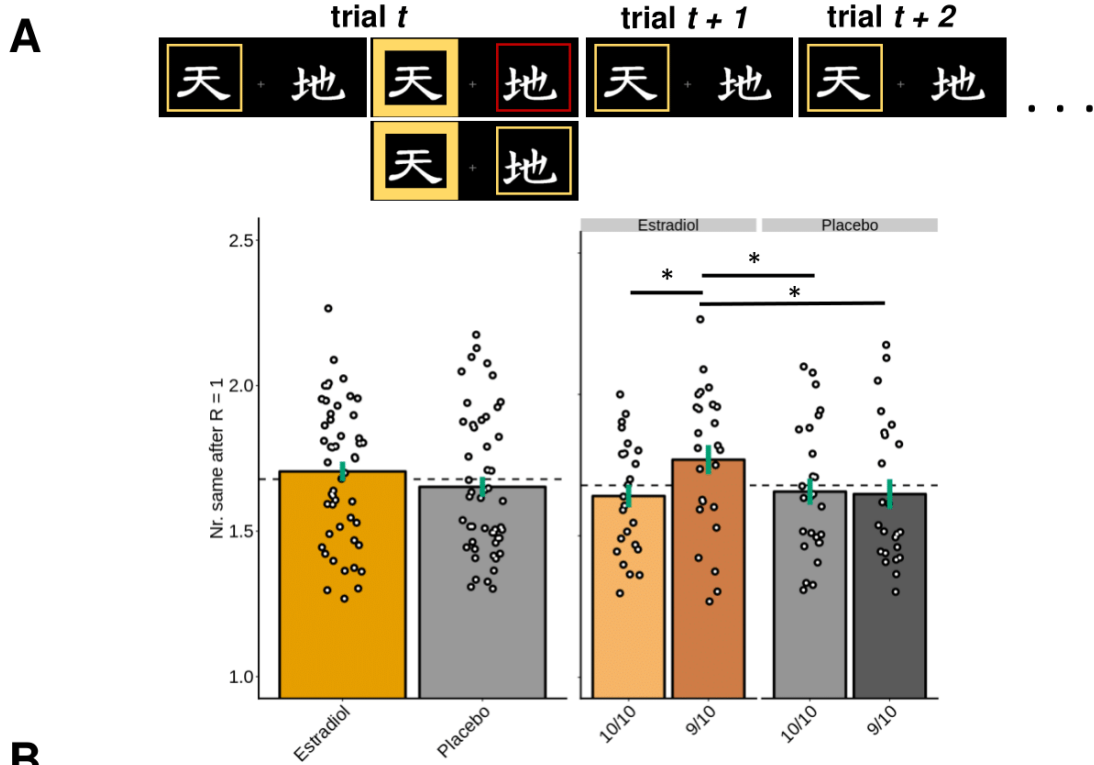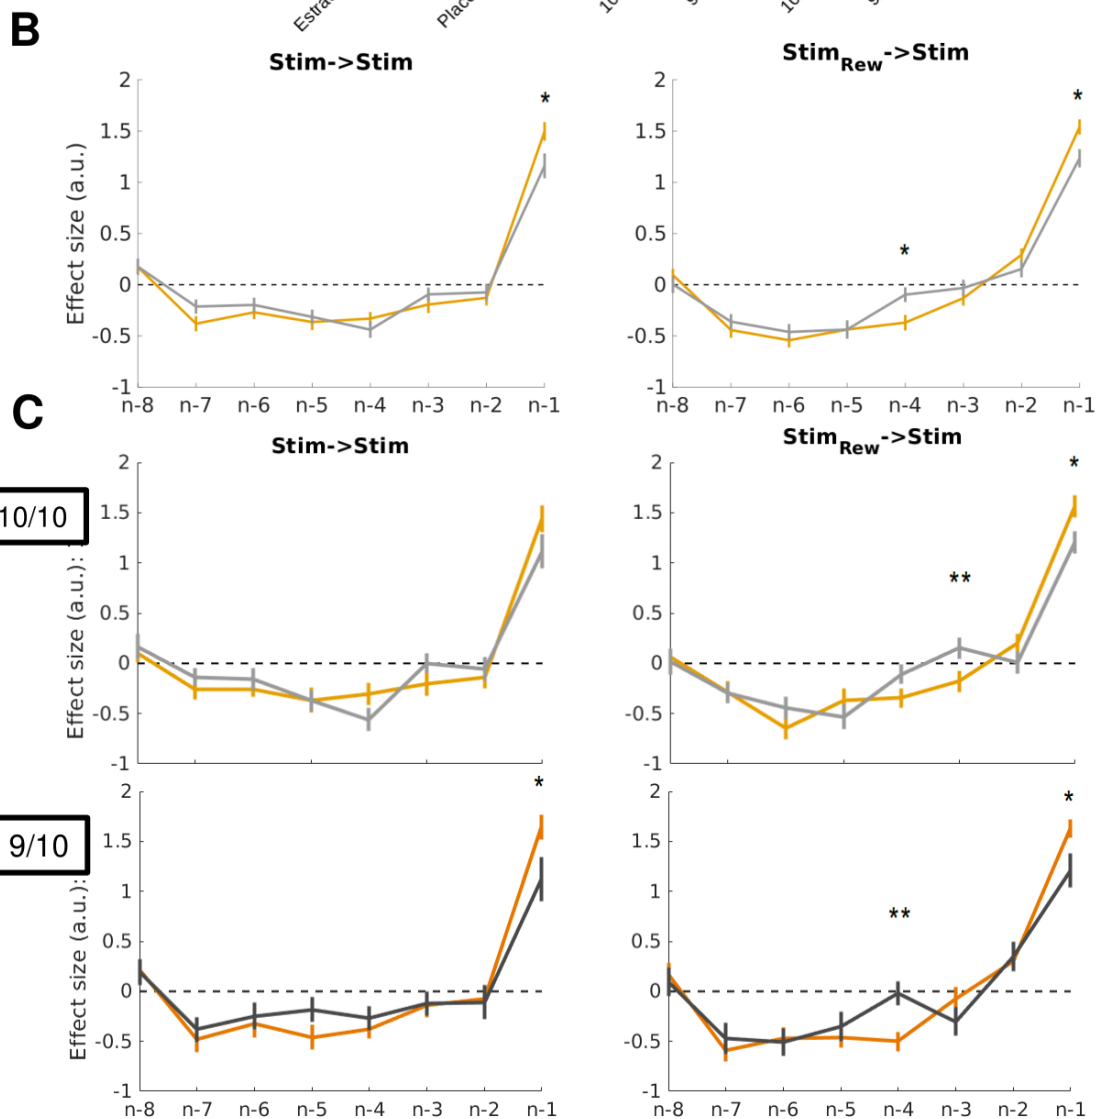

389 **Fig. 5 A)** Staying behaviour: the average number of trials the same option was selected when that  
390 choice was previously rewarded. In both plots, each dot represents a subject, the green error bar  
391 represents standard error of the mean. **BC)** Autocorrelation analysis showing the impact of previous  
392 choices from 1 (n-1) to 8 (n-8) trials ago on the current choice. The left panel shows the averaged effect  
393 for both options irrespective of whether they were previously rewarded for that choice. The right panel  
394 shows the averaged effect for both options when they were previously rewarded for that choice. Both  
395 line plots are the mean and SEM of z-scored regressor weights. **B)** shows the split according to estradiol  
396 and placebo while **C)** shows a further split according to the 9/10 and 10/10 DAT1 polymorphism. \*\*  $p <$   
397  $.01$ , \*  $p < .05$ .

398

## 399 Discussion

400 We examined the causal role of estradiol in reward processing in men. We show that estradiol  
401 affects reward processing and learning in men by increasing reward sensitivity, affecting  
402 choice autocorrelation, and increasing explicit awareness of changing reward probabilities.  
403 Furthermore, we show that estradiol's effect on accuracy is moderated by subjects' striatal  
404 dopaminergic functioning (DAT1 genotype) and reward responsiveness. Finally, we show that  
405 from a computational perspective, its effect can be characterised as an increase in learning  
406 rates.

407 First, we found that estradiol increased reward sensitivity during reinforcement  
408 learning. We observed that both groups systematically choose different options across trials,  
409 and on a subset of trials the options each group chose was statistically significantly different.  
410 Furthermore, estradiol increased choice autocorrelation for recent choices compared to  
411 placebo, while decreasing it for rewarded choice made several trials ago. These findings jointly  
412 show that by increasing reward sensitivity through upregulated striatal reward prediction  
413 errors<sup>8</sup>, estradiol administration caused recent choices and outcomes to be more salient  
414 compared to ones occurring further in the past. This interpretation is further supported by the  
415 estradiol group having higher learning rates for both positive and negative prediction errors,  
416 and subjects explicitly reporting to have observed a higher degree of reward probability  
417 changing. Furthermore, it is supported by the effect of estradiol on accuracy being moderated  
418 by reward responsiveness. The predicted increase in reward prediction errors caused more  
419 reward responsive subjects to switch more, in turn reducing their accuracy, while this

420 relationship did not exist with placebo. The key contribution of the results above is showing,  
421 for the first time, the behavioural and computational effect of estradiol administration on  
422 reinforcement learning in men.

423         Next, we found that the effect of estradiol on accuracy was moderated by the DAT1  
424 genotype, replicating previous correlational studies in women<sup>6,75</sup>. This result provides  
425 evidence for the hypothesis that estradiol may act by amplifying dopamine D1 receptor  
426 signalling in humans<sup>2</sup>, as such an effect would also have been predicted by dopamine  
427 precursor administration<sup>27 26,36</sup>. To determine the robustness of this effect, we computed  
428 several behavioural metrics and Bayes factors to show converging evidence for a moderating  
429 role of DAT1. We found that estradiol administration significantly increased accuracy in  
430 subjects with the 9/10 (i.e. high striatal dopamine) compared to ones with the 10/10 genotype  
431 (i.e. low striatal dopamine) and that this increase in accuracy was likely driven by increased  
432 staying behaviour. That is, subjects with high striatal dopamine chose the same option on  
433 more trials, on average, if they were previously rewarded for that choice, compared to the  
434 other subgroups. Furthermore, even when they were not rewarded, they showed stronger  
435 choice autocorrelation compared to subjects with high striatal dopamine who received a  
436 placebo.

437         The key contribution of the DAT1-related findings is in reconciling discrepancies of  
438 previous correlational work that have been attributed to differences in baseline dopamine  
439 levels<sup>7,51-53</sup>. That is, we show for the first time that baseline differences in dopamine, indeed,  
440 play an important role in how estradiol influences reward processing and that these need to  
441 be considered in future work aiming at better understanding their relationship. Crucially, the  
442 effects we report for accuracy and staying behaviour were not explained by other mechanistic  
443 explanations such as those related to androgen receptor functioning, androgen to estrogen  
444 conversion, or estrogen receptor functioning (see Supplementary Materials).

445         Our results highlight a further feature of how estradiol influences reinforcement  
446 learning. We found that estradiol improved accuracy specifically in the high striatal dopamine

447 group which is in contrast to previous research with the dopamine precursor L-dopa where  
448 decreased accuracy in such subjects was reported but increased accuracy in subjects with  
449 low striatal dopamine was found <sup>26</sup>. However, it is known that dopamine precursors impact  
450 behaviour in a dose-dependent manner <sup>54,55</sup>. This would imply that our estradiol dose acted  
451 akin to a “low dosage” of a dopamine precursor which is supported by two estradiol  
452 administration studies in women. One showing 12 mg of estradiol (i.e. 6 times our dose)  
453 decreasing working memory performance<sup>34</sup>, which was interpreted as an overstimulation of  
454 dopaminergic transmission. With the other showing a dopamine-like dose-dependent effect  
455 of estradiol on hippocampal activity with doses between 2 and 12mg.<sup>35</sup>.

456 In addition to the effects reported for DAT1, we also provide preliminary evidence that  
457 the effect of estradiol is moderated by COMT (see Supplementary Materials). This is in support  
458 of the hypothesis that COMT activity is inhibited through estradiol metabolites which in turn  
459 increases dopamine availability <sup>25 2,56 13,57</sup>.

460 The current study encountered limitations. We recommend future work employing  
461 pharmacogenetics to increase their sample size. While our sample size was approximately  
462 twice as large compared to most previous work <sup>7,25,34,36,52,53,58,59</sup> and in line with suggestions  
463 for the field <sup>2</sup>, we suspect that an increase in sample size, as in work on other hormones <sup>60,61</sup>,  
464 would have enabled us to make more precise claims at the level of polymorphism subgroup.  
465 As no previous estradiol administration study investigated either DAT1 or COMT, we had no  
466 basis for the minimal viable sample size, except the general recommendation in <sup>2</sup>. Our results  
467 therefore await replication in future administration work.

468

469

470

471

## 472 **Conclusion**

473 In conclusion, we have shown that estradiol influences choice behaviour by increasing reward  
474 sensitivity in healthy young men with distinct behavioural and computational signatures and  
475 that these effects are moderated by striatal dopamine-related genes (DAT1) and personality  
476 traits related to reward sensitivity. The approach and findings of this study show that  
477 understanding the role of estradiol in reward processing has important implications for a better  
478 understanding of the biology and neuroscience of human cognition that is moderated by genes  
479 in both health and disorder.

480

## 481 **Acknowledgements**

482 The authors would like to thank Christina Faschinger and Isa Krol for their assistance in data  
483 collection, Nace Mikus for his help in data collection and analysis suggestions, and Lei Zhang  
484 for feedback on the manuscript. The study was supported by the Vienna Science and  
485 Technology Fund (WWTF VRG13-007).

486

## 487 **Conflict of interests**

488 The authors declare no conflict of interest with respect to the research, authorship, and/or  
489 publication of this article. RL received travel grants and/or conference speaker honoraria within  
490 the last three years from Shire, Heel, Bruker, and support from Siemens Healthcare regarding  
491 clinical research using PET/MR. He is a shareholder of BM Health GmbH since 2019.

492

493

494

## 495 **References**

- 496 1. Schultz, W., Dayan, P. & Montague, P. R. A neural substrate of prediction and reward.  
497 *Science (80-. )*. **275**, 1593–1599 (1997).
- 498 2. Diekhof, E. K. Estradiol and the reward system in humans. *Curr. Opin. Behav. Sci.* **23**,  
499 58–64 (2018).
- 500 3. Saldanha, C. J., Ramage-Healey, L. & Schlinger, B. A. Synaptocrine signaling:  
501 Steroid synthesis and action at the synapse. *Endocr. Rev.* **32**, 532–549 (2011).
- 502 4. Luine, V. N. Estradiol and cognitive function: Past, present and future. *Horm. Behav.*  
503 **66**, 602–618 (2014).
- 504 5. Thomas, J., Météreau, E., Déchaud, H., Pugeat, M. & Dreher, J. Hormonal treatment  
505 increases the response of the reward system at the menopause transition : A  
506 counterbalanced randomized placebo-controlled fMRI study.  
507 *Psychoneuroendocrinology* **50**, 167–180 (2014).
- 508 6. Dreher, J. *et al.* Menstrual cycle phase modulates reward-related neural function in  
509 women. *PNAS* **104**, 2465–2470 (2007).
- 510 7. Diekhof, E. K. & Ratnayake, M. Menstrual cycle phase modulates reward sensitivity  
511 and performance monitoring in young women: Preliminary fMRI evidence.  
512 *Neuropsychologia* **84**, 70–80 (2016).
- 513 8. Bayer, J., Rusch, T., Zhang, L., Gläscher, J. & Sommer, T. Dose-dependent effects of  
514 estrogen on prediction error related neural activity in the nucleus accumbens of  
515 healthy young women. *Psychopharmacology (Berl)*. (2019) doi:10.1007/s00213-019-  
516 05409-7.
- 517 9. Lévesque, D. & Di Paolo, T. Rapid conversion of high into low striatal D2-dopamine  
518 receptor agonist binding states after an acute physiological dose of 17 $\beta$ -estradiol.

- 519 *Neurosci. Lett.* **88**, 113–118 (1988).
- 520 10. Becker, J. B. Gender Differences in Dopaminergic Function in Striatum and Nucleus  
521 Accumbens. *Pharmacol. Biochem. Behav.* **64**, 803–812 (1999).
- 522 11. Becker, J. B. Direct effect of 17 $\beta$ -estradiol on striatum: Sex differences in dopamine  
523 release. *Synapse* **5**, 157–164 (1990).
- 524 12. Pasqualini, C., Olivier, V., Guibert, B., Frain, O. & Leviel, V. Acute Stimulatory Effect  
525 of Estradiol on Striatal Dopamine Synthesis. *J. Neurochem.* **65**, 1651–1657 (1995).
- 526 13. Ball, P., Knuppen, R., Haupt, M. & Breuer, H. Interactions Between Estrogens and  
527 Catechol Amines III. Studies on the Methylation of Catechol Estrogens, Catechol  
528 Amines and other Catechols by the Catechol-O-Methyltransferase of Human Liver. *J.*  
529 *Clin. Endocrinol. Metab.* **34**, 736–746 (1972).
- 530 14. Yoest, K. E., Quigley, J. A. & Becker, J. B. Rapid effects of ovarian hormones in  
531 dorsal striatum and nucleus accumbens. *Horm. Behav.* **104**, 119–129 (2018).
- 532 15. Schultz, W., Stauffer, R. W. & Lak, A. The phasic dopamine signal maturing: from  
533 reward via behavioural activation to formal economic utility. *Curr. Opin. Neurobiol.* **43**,  
534 139–148 (2017).
- 535 16. Glimcher, P. W. Understanding dopamine and reinforcement learning: the dopamine  
536 reward prediction error hypothesis. *PNAS* **108**, 15647–54 (2011).
- 537 17. Frank, M. J., Seeberger, L. C. & O'Reilly, R. C. By carrot or by stick: Cognitive  
538 reinforcement learning in Parkinsonism. *Science (80-. )*. **306**, 1940–1943 (2004).
- 539 18. Cools, R. *et al.* Striatal Dopamine Predicts Outcome-Specific Reversal Learning and  
540 Its Sensitivity to Dopaminergic Drug Administration. *J. Neurosci.* **29**, 1538–1543  
541 (2009).
- 542 19. den Ouden, H. E. M. *et al.* Dissociable Effects of Dopamine and Serotonin on



- 543 Reversal Learning. *Neuron* **80**, 1090–1100 (2013).
- 544 20. Jocham, G., Klein, T. A. & Ullsperger, M. Dopamine-Mediated Reinforcement  
545 Learning Signals in the Striatum and Ventromedial Prefrontal Cortex Underlie Value-  
546 Based Choices. *J. Neurosci.* **31**, 1606–1613 (2011).
- 547 21. Jocham, G., Klein, T. a & Ullsperger, M. Differential Modulation of Reinforcement  
548 Learning by D2 Dopamine and NMDA Glutamate Receptor Antagonism. *J. Neurosci.*  
549 **34**, 13151–13162 (2014).
- 550 22. Eisenegger, C. *et al.* Role of dopamine D2 receptors in human reinforcement learning.  
551 *Neuropsychopharmacology* **39**, 2366–2375 (2014).
- 552 23. Swart, J. C. *et al.* Catecholaminergic challenge uncovers distinct Pavlovian and  
553 instrumental mechanisms of motivated (in)action. *Elife* **6**, 1–36 (2017).
- 554 24. Frank, M. J. *et al.* Genetic triple dissociation reveals multiple roles for dopamine in  
555 reinforcement learning. *PNAS* **104**, 16311–16316 (2007).
- 556 25. Jacobs, E. & D’Esposito, M. Estrogen Shapes Dopamine-Dependent Cognitive  
557 Processes: Implications for Women’s Health. *J. Neurosci.* **31**, 5286–5293 (2011).
- 558 26. Eisenegger, C. *et al.* DAT1 Polymorphism Determines L-DOPA Effects on Learning  
559 about Others’ Prosociality. *PLoS One* **8**, e67820 (2013).
- 560 27. Pessiglione, M., Seymour, B., Flandin, G., Dolan, R. J. & Frith, C. D. Dopamine-  
561 dependent prediction errors underpin reward-seeking behaviour in humans. *Nature*  
562 **442**, 1042–1045 (2006).
- 563 28. Doll, B. B., Bath, K. G., Daw, N. D. & Frank, M. J. Variability in dopamine genes  
564 dissociates model-based and model-free reinforcement learning. *J. Neurosci.* **36**,  
565 1211–1222 (2016).
- 566 29. Nemmi, F. *et al.* Interaction between striatal volume and DAT1 polymorphism predicts

- 567 working memory development during adolescence. *Dev. Cogn. Neurosci.* **30**, 191–  
568 199 (2018).
- 569 30. Boksem, M. A. S., Tops, M., Kostermans, E. & De Cremer, D. Sensitivity to  
570 punishment and reward omission: Evidence from error-related ERP components. *Biol.*  
571 *Psychol.* **79**, 185–192 (2008).
- 572 31. Boksem, M. A. S., Tops, M., Wester, A. E., Meijman, T. F. & Lorist, M. M. Error-  
573 related ERP components and individual differences in punishment and reward  
574 sensitivity. *Brain Res.* **1101**, 92–101 (2006).
- 575 32. Lee, S. H., Ham, B. J., Cho, Y. H., Lee, S. M. & Shim, S. H. Association study of  
576 dopamine receptor D2Taql A polymorphism and reward-related personality traits in  
577 healthy Korean young females. *Neuropsychobiology* **56**, 146–151 (2008).
- 578 33. Reuter, M., Schmitz, A., Corr, P. & Hennig, J. Molecular genetics support Gray’s  
579 personality theory: The interaction of COMT and DRD2 polymorphisms predicts the  
580 behavioural approach system. *Int. J. Neuropsychopharmacol.* **9**, 155–166 (2006).
- 581 34. Sommer, T. *et al.* Effects of the experimental administration of oral estrogen on  
582 prefrontal functions in healthy young women. *Psychopharmacology (Berl)*. **235**, 3465–  
583 3477 (2018).
- 584 35. Bayer, J., Gläscher, J., Finsterbusch, J., Schulte, L. H. & Sommer, T. Linear and  
585 inverted U-shaped dose-response functions describe estrogen effects on  
586 hippocampal activity in young women. *Nat. Commun.* **9**, 1–12 (2018).
- 587 36. Jakob, K., Ehrentreich, H., Holtfrederich, S. K. C., Reimers, L. & Diekhof, E. K. DAT1-  
588 genotype and menstrual cycle, but not hormonal contraception, modulate  
589 reinforcement learning: Preliminary evidence. *Front. Endocrinol. (Lausanne)*. **9**, 60  
590 (2018).
- 591 37. Stricker, R. *et al.* Establishment of detailed reference values for luteinizing hormone ,

- 592 follicle stimulating hormone , estradiol , and progesterone during different phases of  
593 the menstrual cycle on the Abbott ARCHITECT □ analyzer. *Clin. Chem. Lab. Med.* **44**,  
594 883–887 (2006).
- 595 38. Eisenegger, C., von Eckardstein, A., Fehr, E. & von Eckardstein, S. Pharmacokinetics  
596 of testosterone and estradiol gel preparations in healthy young men.  
597 *Psychoneuroendocrinology* **38**, 171–178 (2013).
- 598 39. Steyer, R., Schwenkmezger, P., Notz, P. & Eid, M. Testtheoretische Analysen des  
599 Mehrdimensionalen Befindlichkeitsfragebogen. *Diagnostica* **40**, 320–328 (1994).
- 600 40. Patton, J. H., Stanford, M. S. & Barratt, E. S. Factor structure of the barratt  
601 impulsiveness scale. *J. Clin. Psychol.* **51**, 768–774 (1995).
- 602 41. Carver, Charles, S. & White, Teri, L. Behavioral Inhibition, Behavioral Activation, and  
603 Affective Responses to Impending Reward and Punishment: The BIS/BAS Scales. *J.*  
604 *Pers. Soc. Psychol.* **67**, 319–333 (1994).
- 605 42. Kim, S. H., Yoon, H. S., Kim, H. & Hamann, S. Individual differences in sensitivity to  
606 reward and punishment and neural activity during reward and avoidance learning.  
607 *Soc. Cogn. Affect. Neurosci.* **10**, 1219–1227 (2014).
- 608 43. Sali, A. W., Anderson, B. A. & Yantis, S. Reinforcement learning modulates the  
609 stability of cognitive control settings for object selection. *Front. Integr. Neurosci.* **7**, 95  
610 (2013).
- 611 44. Unger, K., Heintz, S. & Kray, J. Punishment sensitivity modulates the processing of  
612 negative feedback but not error-induced learning. *Front. Hum. Neurosci.* **6**, 186  
613 (2012).
- 614 45. Lighthall, N. R., Gorlick, M. A., Schoeke, A., Frank, M. J. & Mather, M. Stress  
615 Modulates Reinforcement Learning in Younger and Older Adults. *Psychol Aging* **28**,  
616 35–46 (2013).

- 617 46. Cools, R. & D'Esposito, M. Inverted-U-shaped dopamine actions on human working  
618 memory and cognitive control. *Biol. Psychiatry* **69**, 113–125 (2011).
- 619 47. Heinz, A. *et al.* Genotype influences in vivo dopamine transporter availability in human  
620 striatum. *Neuropsychopharmacology* **22**, 133–139 (2000).
- 621 48. Ahn, W.-Y., Haines, N. & Zhang, L. Revealing Neurocomputational Mechanisms of  
622 Reinforcement Learning and Decision-Making With the hBayesDM Package. *Comput.*  
623 *Psychiatry* **1**, 24–57 (2017).
- 624 49. Ahn, W. *et al.* Decision-making in stimulant and opiate addicts in protracted  
625 abstinence : evidence from computational modeling with pure users. *Front. Psychol.* **5**,  
626 1–15 (2014).
- 627 50. Daw, N. D., Doherty, J. P. O., Dayan, P., Seymour, B. & Dolan, R. J. Cortical  
628 substrates for exploratory decisions in humans. *Nature* **441**, 876–879 (2006).
- 629 51. Smith, C. T., Sierra, Y., Oppler, S. H. & Boettiger, C. A. Ovarian Cycle Effects on  
630 Immediate Reward Selection Bias in Humans: A Role for Estradiol. *J. Neurosci.* **34**,  
631 5468–5476 (2014).
- 632 52. Diekhof, E. K. Be quick about it. Endogenous estradiol level, menstrual cycle phase  
633 and trait impulsiveness predict impulsive choice in the context of reward acquisition.  
634 *Horm. Behav.* **74**, 186–193 (2015).
- 635 53. Reimers, L., Büchel, C. & Diekhof, E. K. How to be patient. The ability to wait for a  
636 reward depends on menstrual cycle phase and feedback-related activity. *Front.*  
637 *Neurosci.* **8**, 401 (2014).
- 638 54. Chowdhury, R. *et al.* Dopamine restores reward prediction errors in old age. *Nat.*  
639 *Neurosci.* **16**, 648–653 (2013).
- 640 55. Chowdhury, R., Guitart-Masip, M., Bunzeck, N., Dolan, R. J. & Düzel, E. Dopamine  
641 modulates episodic memory persistence in old age. *J. Neurosci.* **32**, 14193–14204

- 642 (2012).
- 643 56. Männistö, P. T. & Kaakkola, S. Catechol-O-methyltransferase (COMT): Biochemistry,  
644 molecular biology, pharmacology, and clinical efficacy of the new selective COMT  
645 inhibitors. *Pharmacol. Rev.* **51**, 593–628 (1999).
- 646 57. Colzato, L. S. & Hommel, B. Effects of estrogen on higher-order cognitive functions in  
647 unstressed human females may depend on individual variation in dopamine baseline  
648 levels. *Front. Neurosci.* **8**, 65 (2014).
- 649 58. Colzato, L. S., Hertsig, G. & Wildenberg, van den Hommel, B. Estrogen modulates  
650 inhibitory control in healthy human females: evidence from the stop-signal paradigm.  
651 *Neuroscience* **167**, 709–715 (2010).
- 652 59. Colzato, L. S., Pratt, J. & Hommel, B. Estrogen modulates inhibition of return in  
653 healthy human females. *Neuropsychologia* **50**, 98–103 (2012).
- 654 60. Geniole, S. N. *et al.* Using a Psychopharmacogenetic Approach To Identify the  
655 Pathways Through Which—and the People for Whom—Testosterone Promotes  
656 Aggression. *Psychol. Sci.* **30**, 481–494 (2019).
- 657 61. Losecaat Vermeer, A. B. *et al.* Exogenous testosterone increases status-seeking  
658 motivation in men with unstable low social status. *Psychoneuroendocrinology* **113**,  
659 (2020).
- 660 62. Sheehan, D. V. *et al.* The validity of the Mini International Neuropsychiatric Interview  
661 (MINI) according to the SCID-P and its reliability. *Eur. Psychiatry* **12**, 232–241 (1997).
- 662 63. Fishman, J., Boyar, R. M. & Hellman, L. Influence of body weight on estradiol  
663 metabolism in young women. *J. Clin. Endocrinol. Metab.* **41**, 989–991 (1975).
- 664 64. Schneider, J. *et al.* Effects of Obesity on Estradiol Metabolism: Decreased Formation  
665 of Nonuterotropic Metabolites. *J. Clin. Endocrinol. Metab.* **56**, 973–978 (1983).

- 666 65. Maidenbaum, S., Miller, J., Stein, J. M. & Jacobs, J. Grid-like hexadirectional  
667 modulation of human entorhinal theta oscillations. *PNAS* **115**, 10798–10803 (2018).
- 668 66. Eisenegger, C., Naef, M., Snozzi, R., Heinrichs, M. & Fehr, E. Prejudice and truth  
669 about the effect of testosterone on human bargaining behaviour. *Nature* **463**, 356–359  
670 (2010).
- 671 67. Aeberli, I., Molinari, L. & Zimmermann, M. B. A composite score combining waist  
672 circumference and body mass index more accurately predicts body fat percentage in  
673 6- to 13-year-old children. *Eur. J. Nutr.* **52**, 247–253 (2013).
- 674 68. Bolker, B. M. *et al.* Generalized linear mixed models: a practical guide for ecology and  
675 evolution. *Trends in Ecology and Evolution* vol. 24 127–135 (2009).
- 676 69. Bates, D., Mächler, M., Bolker, B. M. & Walker, S. C. Fitting linear mixed-effects  
677 models using lme4. *J. Stat. Softw.* **67**, (2015).
- 678 70. Watkins, C. J. C. H. & Dayan, P. Q-learning. *Mach. Learn.* **8**, 279–292 (1992).
- 679 71. de Boer, L. *et al.* Dorsal striatal dopamine D1 receptor availability predicts an  
680 instrumental bias in action learning. *PNAS* **116**, 261–270 (2019).
- 681 72. Rutledge, R. B. *et al.* Dopaminergic Drugs Modulate Learning Rates and  
682 Perseveration in Parkinson ' s Patients in a Dynamic Foraging Task. *J. Neurosci.* **29**,  
683 15104–15114 (2009).
- 684 73. Vehtari, A., Gelman, A. & Gabry, J. Practical Bayesian model evaluation using leave-  
685 one-out cross-validation and WAIC. *Stat. Comput.* **27**, 1413–1432 (2017).
- 686 74. Rigoux, L., Stephan, K. E., Friston, K. J. & Daunizeau, J. Bayesian model selection for  
687 group studies - Revisited. *Neuroimage* **84**, 971–985 (2014).
- 688 75. Daunizeau, J., Adam, V. & Rigoux, L. VBA: A Probabilistic Treatment of Nonlinear  
689 Models for Neurobiological and Behavioural Data. *PLoS Comput. Biol.* **10**, (2014).

- 690 76. Schaaf, M. E. Van Der, Fallon, S. J., Huurne, N., Buitelaar, J. & Cools, R. Working  
691 Memory Capacity Predicts Effects of Methylphenidate on Reversal Learning.  
692 *Neuropsychopharmacology* **38**, 2011–2018 (2013).
- 693 77. Longcope, C., Kato, T. & Horton, R. Conversion of blood androgens to estrogens in  
694 normal adult men and women. *J. Clin. Invest.* **48**, 2191–2201 (1969).
- 695 78. Yaffe, K. *et al.* Androgen receptor CAG repeat polymorphism is associated with  
696 cognitive function in older men. *Biol. Psychiatry* **54**, 943–946 (2003).
- 697 79. Beyenburg, S. *et al.* Androgen receptor mRNA expression in the human  
698 hippocampus. *Neurosci. Lett.* **294**, 25–28 (2000).
- 699 80. Kovacs, D. *et al.* The androgen receptor gene polyglycine repeat polymorphism is  
700 associated with memory performance in healthy Chinese individuals.  
701 *Psychoneuroendocrinology* **34**, 947–952 (2009).
- 702 81. Gillies, G. E. & McArthur, S. Estrogen actions in the brain and the basis for differential  
703 action in men and women: A case for sex-specific medicines. *Pharmacol. Rev.* **62**,  
704 155–198 (2010).
- 705 82. Bayer, J. *et al.* Estrogen and the male hippocampus: Genetic variation in the  
706 aromatase gene predicting serum estrogen is associated with hippocampal gray  
707 matter volume in men. *Hippocampus* **23**, 117–121 (2013).
- 708 83. Kravitz, H. M., Meyer, P. M., Seeman, T. E., Greendale, G. A. & Sowers, M. F. R.  
709 Cognitive Functioning and Sex Steroid Hormone Gene Polymorphisms in Women at  
710 Midlife. *Am. J. Med.* **119**, 94–102 (2006).
- 711 84. Almey, A., Milner, T. A. & Brake, W. G. Estrogen receptors in the central nervous  
712 system and their implication for dopamine-dependent cognition in females. *Horm.*  
713 *Behav.* **74**, 125–138 (2015).
- 714 85. Ma, S. L. *et al.* Polymorphisms of the estrogen receptor (ESR1) gene and the risk of

715 Alzheimer's disease in a southern Chinese community. *Int. Psychogeriatrics* **21**, 977–  
716 986 (2009).

717

718

719

720

721

722

723

724

725

726

727

728

729

730

731

732

733

734

735



736 **Supplementary Materials:**

737 **A causal role for estradiol in human reinforcement learning**

738 Sebastijan Veselic<sup>1,2,3\*</sup>, Gerhard Jocham<sup>4</sup>, Christian Gausterer<sup>5</sup>, Bernhard Wagner<sup>6</sup>, Miriam  
739 Ernhoefer-Reßler<sup>6</sup>, Rupert Lanzenberger<sup>7</sup>, Clauss Lamm<sup>1,8</sup>, Christoph Eisenegger<sup>1</sup> & Annabel  
740 Losecaat Vermeer<sup>1\*</sup>

741

742

743

744

745

746

747

748

749

750

751

752

753

754

755

756

## 757 **Methods**

### 758 **Subjects**

759 The short version of e-MINI <sup>62</sup> was used to screen and exclude those who had a non-  
760 diagnosed, disclosed, or a diagnosed psychiatric disorder. Subjects were recruited through  
761 social media, web portals, and flyers on university premises. All subjects provided written  
762 informed consent and were financially compensated for the completion of the experiment (50€)  
763 and received an additional maximum bonus of 40€ (range 7€ – 30€) based on their  
764 performance in the all the tasks.

### 765 **Measurement Instruments**

#### 766 **Experimental Tasks**

767 For each task, we gave subjects paper instructions including control questions to check  
768 whether all subjects understood the instructions. All tasks except for the N-BACK task were  
769 monetarily incentivised.

770 **Reinforcement Learning:** In addition to the main 500 trials, subjects were trained on 10  
771 practice trials with two initial options to learn how the task works. The initial two options were  
772 then changed (i.e. the sensory cues) before the main trials started. We did this to avoid carry-  
773 over effects from practice to the main task. As shown in Fig. 1, each trial included three stages:  
774 (1) a cue onset stage (5 sec) where subjects had to decide between the two options and press  
775 the corresponding key. If they did not respond within that time frame, they would see a warning  
776 message indicating they should respond and try to be faster next time; (2) a choice feedback  
777 stage (1 sec) where subjects received information about both the chosen (thick frame) and  
778 unchosen (thin frame) option (yellow - correct, red - wrong); and (3) an inter-trial interval ( $M =$   
779 1.5 sec, jittered between 0.9 to 2.1 sec).

780 **Working memory capacity:** As described in the manuscript, subjects were presented with a  
781 sequence of letters one-by-one. For each letter, they had to decide if the current letter was the

782 same as the one presented  $N$  trials ago by pressing “R”, in case it was not the same they had to  
783 press “O”. For example, in the 3-back condition, the letter sequence “**A B D A A**” would require  
784 subjects to press “R” only to the second occurrence of A, as this was the same letter as the one  
785 3 trials ago. The last A in this example sequence is defined as a lure trial, while the other letters  
786 were nontarget trials. Lure trials were present only in the 2-BACK and 3-BACK conditions as  
787 in <sup>25</sup>, and while lure trials were added to keep the task consistent with their implementation,  
788 we did not further analyse them separately as they were not relevant for our question. In total,  
789 there were four blocks per condition. Each block was announced by an instruction lasting for  
790 2 sec (Fig. 1A), a fixation cross (1 sec) and a sequence of 20 trials. Each trial was presented  
791 for 1 sec with a 1 sec feedback phase and a 1 sec inter-stimulus interval. After every 20 trials,  
792 subjects had a 3 sec resting period, before the next block was announced. A lack of response  
793 to any cue was considered a miss.

## 794 **Procedure**

795 During the first session, we assessed height, weight, abdominal, and visceral fat because  
796 these variables could impact estradiol metabolism <sup>63,64</sup>. On the second session subjects  
797 applied a topical transparent gel on their chest and shoulders that either contained 2 mg of  
798 estradiol (Divigel, Orion Pharma AG, Zug Switzerland) or a placebo. A male experimenter was  
799 present to ensure that the subjects applied the gel correctly.

## 800 **Statistical analysis**

## 801 **Behavioural analysis**

802 To quantify statistical significance for the cumulative choice difference reported in the  
803 manuscript, we employed permutation testing (2000 iterations) by shuffling the responses of  
804 each subject and thereby decoupling the label from the responses, thus building a null  
805 distribution. The null distribution shows the difference that would be expected from random  
806 allocation to the group. To determine significance, we computed z-scores as measures of  
807 standardized effect size (e.g. <sup>65</sup>) by subtracting from the quantity of interest the mean of the

808 null distribution and dividing it by the standard deviation of the null distribution. From this, we  
809 were able to use the Fisher-z-transformation to obtain p-values.

810 We used two-sample proportion z-tests to determine the percentage of trials on which  
811 the number of subjects who chose option A in one group was statistically significantly different  
812 from the other group on a trial-by-trial basis.

813 For all general linear models reported in the main results, we regressed out several  
814 nuisance regressors known to impact estradiol metabolism or affect reinforcement learning  
815 behaviour. These included weight, BMI, abdominal and visceral fat <sup>63,64</sup>, post-administration  
816 cortisol levels <sup>45</sup>, and beliefs related to having received the drug. This was done because of  
817 our previous work showing the impact of beliefs about a hormone on subsequent behaviour,  
818 irrespective of whether subjects underwent treatment or received placebo <sup>66</sup>.

819 All linear models were compared with BIC and AIC. Unless stated otherwise in the  
820 main text, for all reported results the winning model regressed out cortisol levels following  
821 administration, beliefs about having received the drug, the certainty of that belief and whether  
822 they had observed any changes in themselves, a composite score of weight and BMI that  
823 were summed together <sup>67</sup> because of their high intrinsic correlation ( $r = 0.89$ ), visceral, and  
824 abdominal fat. For general linear models involving accuracy, we also regressed out reaction  
825 times to control for accuracy-speed trade-offs. All nuisance regressors were z-scored.

826 We compared both treatment groups for age and other bodily characteristics (i.e. BMI,  
827 height, weight, visceral, and abdominal fat) and potential differences in self-reported mood  
828 (MDBF), impulsiveness (BIS-11) and reward responsiveness (BIS/BAS) (see Questionnaires,  
829 Table S4 and S5). We used two-tailed independent samples Welch t-tests, or Wilcoxon  
830 signed-rank test if assumptions of normality were not met, to test whether the groups matched  
831 on all variables. To test for mood differences after administration between the treatment  
832 groups, we performed an ANCOVA for each of the three subscales of the MDBF questionnaire  
833 where we controlled for baseline mood scores. Two-way ANOVAs were further performed on

834 the individual subscales of the BIS-11 questionnaire to investigate whether there was an  
835 interaction between the group (estradiol, placebo) and session (pre, post) on impulsiveness.

836 To compare working memory capacity assessed by the N-BACK task, we analysed  
837 target accuracy, reaction times, and d-prime. We analyzed this with an ANOVA containing the  
838 between-subject variable group (estradiol, placebo) and within-subject variable for condition  
839 together with an interaction term for group and condition.

840 In the supplementary results we used generalized linear mixed effects models using  
841 the lme4 package in R <sup>68,69</sup> to investigate whether the interaction between drug, DAT1 or  
842 COMT and trial would be predictive of the subjects' chosen option.

### 843 **Computational modelling**

844 To test whether estradiol would increase reward sensitivity and thereby learning, we  
845 formalized behaviour within a reinforcement learning framework and fitted several Q-learning  
846 models <sup>70</sup> with softmax choice rules:

847 Q-learning model (equation 1):

$$848 \quad Q_{t+1}^A = Q_t^A + \alpha(R_t^A - Q_t^A) \quad (1)$$

849 Softmax choice rule (equation 2):

$$850 \quad p = \frac{1}{1 + e^{\tau(Q_t^A - Q_t^B)}} \quad (2)$$

851 Where,  $t$  is time,  $A$  is option A,  $Q$  is subjective value,  $\alpha$  is the learning rate,  $R$  is the obtained  
852 reward, and  $\tau$  is the temperature parameter. Equations 1 and 2 represent our first model  
853 (model 1). In Q-learning, the basic idea is that agents learn subjective values of actions they  
854 perform in their environment. Subjective values are learned and updated through a value  
855 function (Equation 1) following feedback after each action. A teaching signal known as the  
856 learning rate-weighted prediction error dictates how strongly the subjective value will be  
857 updated on each action. The prediction error corresponds to the difference between the  
858 obtained and expected reward (i.e. the subjective value prior to making the new choice). Within

859 this process, the learning rate dictates how heavily new information will be weighted in  
860 proportion to previous information about the option, and therefore how strongly the subjective  
861 value will change from its current estimate. The softmax equation then yields the probability  
862 of selecting an action given the learning rate and the temperature parameter, which reflects  
863 stochasticity of choice behaviour.

864 By employing computational modelling of this sort, we were able to obtain parameter  
865 estimates that quantify the difference in subjects' behaviour, captured by a difference in  
866 learning rates. To obtain a more precise account of the effect of estradiol on reward  
867 processing, we extended the basic Q-learning model in several ways, as described below.

868 The first extension (equation 3a and 3b) allowed for separate learning rates for  $\alpha_{Pos}$   
869 and  $\alpha_{Neg}$  that would differentiate between learning from positive and negative prediction  
870 errors.

$$871 \quad Q_{t+1}^A = Q_t^A + \alpha_{Pos}(R_t^A - Q_t^A) \quad (3a)$$

$$872 \quad Q_{t+1}^A = Q_t^A + \alpha_{Neg}(R_t^A - Q_t^A) \quad (3b)$$

873

874 The updating with a positive learning rate occurs when the prediction error term ( $R_t^A - Q_t^A$ )  
875 evaluates to positive while updating with the negative learning rate occurs when the prediction  
876 error term evaluates to negative. Furthermore, due to reward stochasticity of our task reward  
877 probability distribution (obtained by a Gaussian random walk – Fig. 1B), we added an  
878 additional parameter  $\xi$ , representing a lapse or irreducible noise parameter <sup>71</sup> in our choice  
879 rule (equation 4):

$$880 \quad p = \frac{1}{1 + e^{\tau(Q_t^A - Q_t^B)}}(1 - \xi) + \frac{\xi}{2} \quad (4)$$

881

882 Finally, we added a perseverance parameter  $\lambda$  <sup>72</sup> (equation 5):

883 
$$p = \frac{1}{1 + e^{\tau(Q_t^A - Q_t^B + \lambda C)}} (1 - \xi) + \frac{\xi}{2} \quad (5)$$

884

885 Where  $C = 1$ , if the same option was chosen on trial  $n$  and trial  $n+1$ , and  $C = -1$  if the opposite  
886 was true. In summary, our full model had separate learning rates for positive and negative  
887 prediction errors, a choice stochasticity, irreducible noise, and perseverance parameter. All  
888 other models were reduced cases of this model and all possible combinations of the described  
889 free parameters therefore yielded eight models in total for which we estimated parameters:

890 **Table S0. Models and parameters**

---

|         |                                                                       |
|---------|-----------------------------------------------------------------------|
| Model 1 | Learning rate, temperature                                            |
| Model 2 | Learning rate, temperature, lapse                                     |
| Model 3 | Learning rate, temperature, perseverance                              |
| Model 4 | Learning rate, temperature, lapse, perseverance                       |
| Model 5 | Positive and negative learning rate, temperature                      |
| Model 6 | Positive and negative learning rate, temperature, lapse               |
| Model 7 | Positive and negative learning rate, temperature, perseverance        |
| Model 8 | Positive and negative learning rate, temperature, lapse, perseverance |

---

891

892 The model fitting was performed using JAGS and the rjags (v 4.9) package in R (v 3.6.0).  
893 Each model was run with 5000 samples each with 1000 burn-in samples on three chains.  
894 Priors over parameters and hyperparameters were set to default as described in <sup>48</sup>. We  
895 computed the leave one out information criterion using the loo package <sup>73</sup> and used this metric  
896 to compare the models. Furthermore, we performed Bayesian model comparison by  
897 computing the (protected) exceedance probability <sup>74</sup> using the VBA toolbox <sup>75</sup> to determine the  
898 best model and compare its congruency with the LOOIC measure. Finally, we extracted the  
899 posterior predictive density for each subject as a measure of predictive power of the best  
900 model. This was then compared to the actual behaviour as a measure of static (accuracy

901 collapsed across time) and dynamic (accuracy at each trial across subjects) predictive  
902 accuracy. From the obtained maximum a-posteriori estimates we then generated synthetic  
903 datasets for each subject and refit the model using synthetic data to assess parameter  
904 recovery. We did this by correlating our original and recovered parameters to determine  
905 whether the learning rate parameters of the winning model were correlated.

## 906 **Genotyping**

### 907 **DNA extraction and quantification**

908 Buccal swabs were collected using sterile cotton swabs (Sarstedt AG, Germany). DNA was  
909 extracted from swabs using the QIAamp DNA Mini kit (Qiagen, Hilden, Germany) and eluted  
910 in a final volume of 50  $\mu$ L of QIAamp buffer AE (Qiagen). Human nuclear DNA was quantified  
911 using the Applied Biosystems (AB) 7500 real-time PCR instrument (Thermo Fisher Scientific,  
912 Waltham, MA) and the Quantifiler Human Plus quantification Kit (AB) following manufacturer's  
913 recommendations.

### 914 **Typing of repeat length polymorphisms**

915 Genomic DNA fragments that contain polymorphic repeat sequences were amplified in two  
916 separate reactions: i.e. a multiplex PCR (simultaneously targeting AR(CAG)<sub>n</sub>, DAT1 VNTR,  
917 ER $\alpha$ (TA)<sub>n</sub> and ER $\beta$ (CA)<sub>n</sub>) and a singleplex PCR (targeting solely AR(GGN)<sub>n</sub>), respectively.

918 The multiplex PCR was performed using 5 ng template DNA in a reaction mix (total  
919 volume of 25  $\mu$ L) consisting of 1  $\times$  GeneAmp PCR buffer (AB), 0.25 mM each dNTP, 2.5 units  
920 AmpliTaq Gold polymerase (AB) and target specific primers (AR(CAG), DAT1, ER $\alpha$  and ER $\beta$ ;  
921 including 5'-fluorescent-dye-labeled forward primers; details provided in Table 1). The  
922 following protocol was applied using the Veriti 96-well thermal cycler (AB): 35 cycles at 95  $^{\circ}$ C  
923 for 30 seconds, 55  $^{\circ}$ C for 1 minute, and 72  $^{\circ}$ C for 1 minute. Before the first cycle, an initial  
924 denaturation (95  $^{\circ}$ C for 5 minutes) was included, and the last cycle was followed by a final  
925 extension step at 72  $^{\circ}$ C for 45 minutes.



926 The singleplex PCR was conducted using 5 ng template DNA in a reaction mix (total  
 927 volume of 20  $\mu$ L) containing target specific primers (AR(GGN)<sub>n</sub>, details provided in Table S1)),  
 928 0.5  $\mu$ L Phire Hot Start II DNA polymerase (Thermo Fisher) in 1  $\times$  Phire reaction buffer (Thermo  
 929 Fisher). Amplification was carried out on the Veriti thermal cycler (AB) and included an initial  
 930 denaturation step at 98 °C for 30 seconds, followed by 33 cycles of 10 seconds at 98 °C, 30  
 931 seconds at 60 °C and 30 seconds at 72 °C. The last cycle was followed by a final extension  
 932 at 72 °C for 10 minutes.

933 Aliquots of PCR products were diluted with Hi-Di formamide (AB), mixed with internal lane  
 934 standard LIZ 600 v.2 (AB) and separated on the ABI 3500 Genetic Analyzer applying standard  
 935 conditions. The number of repeats predicted by the GeneMapper ID-X software (AB) was in  
 936 full agreement to the actual repeats determined by direct sequencing of PCR products using  
 937 the BigDye Terminator Sequencing Kit v3.1 (AB) in selected DNA samples.

938 **Table S1. Panel of loci and primer sets used for the typing of repeat length**  
 939 **polymorphisms**

| 940 | <sup>a</sup> Marker               | Location <sup>b</sup>       | Primer sequence 5'-3' <sup>c</sup> | Dye   | Orientation | Conc. (nM) <sup>d</sup> |
|-----|-----------------------------------|-----------------------------|------------------------------------|-------|-------------|-------------------------|
|     | AR(GGN) <sub>n</sub> <sup>a</sup> | chrX:67546447-67546603(+)   | CCTGGCACACTCTCTTCACA               | VIC   | forward     | 625                     |
|     |                                   |                             | <u>GTTTCTGGCCGAGTGTAGCCGTAG</u>    |       | reverse     |                         |
|     | AR(CAG) <sub>n</sub>              | chrX:67545237-67545434(+)   | CGCGAAGTGATCCAGAACC                | 6-FAM | forward     | 200                     |
|     |                                   |                             | <u>GTTTCTAGAACCATCCTCACCCTGCT</u>  |       | reverse     |                         |
|     | DAT1 VNTR                         | chr5:1393559-1394008(-)     | TGTGGTGTAGGGAACGGCCTGAGA           | 6-FAM | forward     | 400                     |
|     |                                   |                             | TGTTGGTCTGCAGGCTGCCTGCAT           |       | reverse     |                         |
|     | ER $\alpha$ (TA) <sub>n</sub>     | chr6:151806472-151806594(+) | AACTATCCAAGATTATAGACGCATGA         | NED   | forward     | 600                     |
|     |                                   |                             | <u>GTTTCTAACATGCACACGCACATACA</u>  |       | reverse     |                         |
|     | Er $\beta$ (CA) <sub>n</sub>      | chr14:64253529-64253650(-)  | GTGCTGCGAGCAGAGATA                 | PET   | forward     | 800                     |
|     |                                   |                             | <u>GTTTCTAATGAGTGGGCCCTCCCTTAG</u> |       | reverse     |                         |

941 AR(GGN)<sub>n</sub> primers only used in singleplex PCR; all other primers combined in a multiplex PCR

942 <sup>b</sup> Chromosome number and genomic location of targeted sequence (orientation provided in brackets) according to  
 943 UCSC version hg38 (<http://genome.ucsc.edu/>)

944 <sup>c</sup> The non-specific primer tail is underlined in Italics

945 <sup>d</sup> The final primer concentrations in the reaction mix

946

947

948

949 **Typing of the COMT Val158Met polymorphism**

950 SNaPshot minisequencing was applied for the typing of Val158Met variants in the COMT  
 951 gene. Therefore, a 177 bp fragment of genomic DNA harbouring the causative single  
 952 nucleotide polymorphism (SNP rs4680) in its centre was amplified by PCR. The reaction mix  
 953 comprised 5 ng template DNA, 1 × GeneAmp PCR buffer (AB), 0.25 mM each dNTP, 2.5 units  
 954 AmpliTaq Gold polymerase (AB) and target specific primers (details provided in Table S2) in  
 955 a total reaction volume of 25 µL. Thermal cycling was performed applying the Veriti cyclers (AB)  
 956 and conditions as follows: 95 °C for 5 min; 35 cycles of 95 °C for 15 seconds, 59 °C for 30  
 957 seconds and 72 °C for 1 minute; final extension at 72 °C for 5 minutes.

958 **Table S2. Primer set used for PCR of the COMT fragment**

| Marker | Location <sup>a</sup>      | Primer sequence 5'-3' <sup>b</sup> | Orientation | Conc. (nM) <sup>c</sup> |
|--------|----------------------------|------------------------------------|-------------|-------------------------|
| COMT   | chr22:19963623-19963799(+) | GGGCCTACTGTGGCTACTCA               | forward     | 400                     |
|        |                            | GCCCTTTTTCCAGGTCTGA                | reverse     |                         |

959 <sup>a</sup> Chromosome number and genomic location of targeted sequence (orientation provided in brackets) according to  
 960 UCSC version hg38 (<http://genome.ucsc.edu/>).

961

962 PCR products were purified from excess primers and dNTPs by ExoSAP-IT (Thermo Fisher)  
 963 treatment following manufacturer's recommendations. Minisequencing was conducted on a  
 964 Veriti thermal cycler (AB) in a total volume of 10 µL containing 3 µL of purified PCR product,  
 965 5 µL SNaPshot Multiplex Ready Reaction mix (Thermo Fisher) and 2 µL minisequencing  
 966 primer (2 µM; details see Table 3). The cycling conditions (25 cycles) were as follows:  
 967 denaturation at 96 °C for 10 seconds, annealing at 50 °C for 5 seconds and extension at 60  
 968 °C for 30 seconds.

969 **Table S3. Minisequencing primer information**

| SNP sequence variation | Location <sup>a</sup>   | Primer sequence 5'-3' <sup>b</sup>                 | Orientation |
|------------------------|-------------------------|----------------------------------------------------|-------------|
| G>A                    | chr22:19963728-19963747 | ( <u>GATC</u> ) <sub>4</sub> GGATGGTGGATTTTCGCTGGC | forward     |

970 <sup>a</sup> Chromosome number and genomic location of primer binding site (orientation provided in brackets) according to  
 971 UCSC version hg38 (<http://genome.ucsc.edu/>). The targeted SNP rs4680 is located at position chr22:19963748.

972 <sup>b</sup> The non-specific primer tail is underlined in Italics  
973

974 ExoSAP-IT treatment was again applied for the clean-up of the minisequencing reaction. 5 µl  
975 of purified minisequencing reaction product was then mixed with 9.3 µL Hi-Di formamide (AB)  
976 and 0.2 µL of GeneScan-LIZ 120 internal size standard (AB). After a denaturing step for 5 min  
977 at 98 °C followed by cooling to 4 °C the fragments were separated on an ABI PRISM 310  
978 Genetic Analyzer (AB) with POP4 polymer and analysed with GeneMapper v3.2 software.  
979 Calling of SNP variants based on minisequencing was in full agreement to results from direct  
980 sequencing of PCR products in selected DNA samples.

### 981 **Hormone concentrations**

982 Quantification of estrone and estradiol in saliva samples was performed with derivatization  
983 using pentafluorobenzoyl chloride (PFBCl) and the addition of the isotopically labeled internal  
984 standards estrone-d<sub>4</sub> and estradiol-d<sub>5</sub>. Organic saliva was reacted with 1.0 mL 1% PFBCl and  
985 0.1 mL pyridine at 60°C for 30 min. The derivatization agents were evaporated, the sample  
986 was reconstituted with 0.5 mL NaHCO<sub>3</sub> and extracted with 1 mL n-hexane. The organic phase  
987 was substituted with 0.2 mL dodecane and subjected to optimized GC-MS/MS analysis using  
988 an Agilent 7890 GC with Agilent DB-17ht 15 m x 0.25 mm x 0.15 µm capillary column  
989 connected to an Agilent 7010 tandem mass spectrometer operated in MRM mode using  
990 negative chemical ionization at 150°C with methane as a reaction gas (40%, 2 mL/min).  
991 Method validation was performed using ion transition m/z 464 -> 400 as a quantifier for estrone  
992 and m/z 660 -> 596 for estradiol, whereas a LLOQ of 1.92 fg o.c. and 1.94 fg was obtained,  
993 respectively.

994 Quantification of hydrocortisone and testosterone in saliva samples was performed  
995 using liquid chromatography tandem mass spectrometry (LCMS/MS), with an Agilent 6460  
996 with electrospray ionization in positive mode coupled to a 1290 UHPLC system. Collision  
997 energy was optimized for specific MRM transitions of Hydrocortisone (363.2/121.1 m/z;  
998 363.2/91.1 m/z), Testosterone (289.2/109.1; 289.2/97.1 m/z), 2,3,4-<sup>13</sup>C<sub>3</sub>-Hydrocortisone  
999 (366.2/124 m/z) and 2,3,4-<sup>13</sup>C<sub>3</sub>-Testosterone (292.2/100 m/z). Agilent Poroshell 120 EC-C18

1000 was used for chromatographic separation under reversed phase conditions. The internal  
1001 standard preparation and internal standard mixture was prepared containing 2,3,4-<sup>13</sup>C-  
1002 Hydrocortisone; 2,3,4-<sup>13</sup>C-Testosterone, 2,4,16,16,17-d<sup>5</sup>-17 $\beta$ -Estradiol and concentration  
1003 of 5ng/mL each. Samples were prepared by adding 100  $\mu$ l internal standards (5 ng/mL) to  
1004 500 $\mu$ l plasma or saliva and the steroids were extracted using 4 mL MTBE. After 10 min.  
1005 overhead shaking, the samples were centrifuged for 5 min. at 3000 rpm and the top MTBE  
1006 layer was transferred to a test tube. MTBE was evaporated using a centrivap concentrator at  
1007 40°C (Labconco). The residual sample was then re-dissolved in methanol and analyzed by  
1008 LC-MS/MS.

## 1009 Questionnaires

1010 **Mood:** To control for a potential confound of mood, tiredness, or alertness from the treatment  
1011 affecting subjects' performance<sup>22</sup>, we assessed subjects' self-reported mood before and after  
1012 administration of the treatment, using the German Multidimensional Mood State Questionnaire  
1013 ("Der Mehrdimensionale Befindlichkeitsfragebogen - MDBF)<sup>39</sup> *Both versions of this*  
1014 *questionnaire (A and B) contain 12 items with a 5-level Likert scale and three subscales that*  
1015 *test for different continuums of mood (Good-Bad [ $\alpha_{pre} = .81, \alpha_{post} = .77$ ], Awake-Tired [ $\alpha_{pre} =$*   
1016 *.84,  $\alpha_{post} = .87$ ], Calm-Nervous [ $\alpha_{pre} = .73, \alpha_{post} = .75$ ]).*

1017 **Impulsiveness:** We used the Barratt Impulsiveness Scale (BIS-11;<sup>40</sup> to measure subjects'  
1018 impulsiveness as<sup>52</sup> observed that variations in estradiol levels differentially affected women  
1019 with low trait as opposed to high trait impulsiveness. BIS-11 is a widely used measure for  
1020 impulsiveness with 30 items describing common behaviour and preferences related to  
1021 (non)impulsiveness which individuals have to rate on a 4-point scale (1 - rarely/never, almost  
1022 always/always - 4). The General Impulsiveness ( $\alpha_{pre} = .71, \alpha_{post} = .75$ ) factor together with its  
1023 three second-order factors (Motor Impulsiveness ( $\alpha_{pre} = .47, \alpha_{post} = .54$ ) Nonplanning  
1024 Impulsiveness ( $\alpha_{pre} = .6, \alpha_{post} = .63$ ), Attentional Impulsiveness ( $\alpha_{pre} = .49, \alpha_{post} = .52$ ) are  
1025 reported.

1026 **Behavioural inhibition and activation:** we measured the trait behavioural activation and  
1027 inhibition with the Behavioural inhibition/Behavioural Activation Scales (BIS/BAS; <sup>41</sup>. The BAS  
1028 scale is a 24-item questionnaire answered on a four-level scale (1- very true for me, 4 - very  
1029 false for me). It is subdivided into Drive ( $\alpha = .74$ ), Fun Seeking ( $\alpha = .67$ ), and Reward  
1030 Responsiveness ( $\alpha = .6$ ) while the BIS scale ( $\alpha = .77$ ) is unidimensional. Drive is thought to  
1031 measure the persistent pursuit of goals (e.g. “I go out of my way to get the things I want”), Fun  
1032 Seeking: the desire for new rewards and willingness to approach events that would be  
1033 potentially rewarding (e.g. “I crave excitement and new sensations”), while Reward  
1034 Responsiveness focuses on positive responses that would occur if a reward is anticipated  
1035 (e.g. “When I am doing well at something I love to keep doing it”). Finally, the BIS scale  
1036 measures sensitivity to negative events (e.g. “Criticism or scolding hurts me quite a bit”).

### 1037 **Belief probes**

1038 In addition, we probed subjects’ beliefs and confidence about receiving estradiol (e.g. whether  
1039 they believed they received estradiol or a placebo, how certain they were of this answer, and  
1040 whether they noticed any changes). This was done to later regress out the potential  
1041 contribution of beliefs arising, for example, from subjects researching potential side effects of  
1042 the hormone prior the experiment. Namely, subjects’ beliefs about having received a hormone  
1043 and beliefs about the effects of a hormone on their performance have previously shown to  
1044 modulate behaviour independent of whether subjects had actually received it<sup>66</sup>.

1045

1046

1047

1048

1049

1050

1051

1052

## 1053 **Results**

### 1054 **Matching of both groups**

1055 In the first part of the supplementary results, Table S4 and S5 show that our random  
1056 assignment was successful as the groups did not differ in any of the measured parameters  
1057 before (Table S4) administration and as a function of administration (Table S5). However, we  
1058 did observe the expected change in estradiol metabolite concentrations in the estradiol group,  
1059 outlined below.

1060

### 1061 **Hormone concentrations**

1062 We observed a statistically significant post-administration difference between both groups in  
1063 log-transformed estradiol concentrations ( $W = 1545$ , 95% CI [0.03, 1.87],  $p < .05$ ) with the  
1064 estradiol group having higher estradiol metabolite concentration following administration  
1065 (estradiol:  $Mdn = 41.77 \pm 531.54$ ), placebo:  $Mdn = 5.55 \pm 230.23$ ) but not before (estradiol:  $Mdn$   
1066  $= 3.38 \pm 230.97$ ), placebo:  $Mdn = 1.89 \pm 21.92$ ) compared to the placebo group ( $W = 1498$ ,  
1067 95% CI [-0.05, 1.03],  $p = .09$ ). We report the median for the values above because even after  
1068 log-transforming the metabolite concentrations, they were not distributed normally.  
1069 Importantly, because we have observed high interindividual variance in estradiol  
1070 concentrations prior to administration, we have reason to believe the obtained metabolite  
1071 concentrations were contaminated during the handling of the samples following our data  
1072 collection. Namely, in previous work such baseline variation was not observed despite an  
1073 identical procedure and dosage with the main difference being that serum levels of estradiol  
1074 were measured there <sup>38</sup>. Log-transformed estrone and cortisol concentrations after  
1075 administration were also examined showing no differences between both groups. Estrone:  
1076 (experimental:  $Mdn = 8.79 \pm 4226.69$ ), control:  $Mdn = 5.80 \pm 161.99$ ) ( $W = 1427$ , 95% CI [-0.17,  
1077 1.05],  $p = .16$ ), cortisol: (experimental:  $Mdn = 0.77 \pm 0.94$ ), control:  $Mdn = 0.73 \pm 1.15$ ) ( $W =$   
1078  $1207$ , 95% CI [-0.31, 0.27],  $p = .90$ ).

1079

1080 **Bodily measures and behavioural characteristics**

1081 As outlined in Table S4, both the estradiol and placebo group were also matched for their  
 1082 weight, height, BMI, visceral, abdominal fat, and individual sub scales of the BIS/BAS  
 1083 questionnaire (Drive, Reward, Fun-Seeking, Behavioural Inhibition). Similarly, separate one-  
 1084 way ANOVAs revealed no interaction for the four subscales of BIS-11 (Table S5) (General:  
 1085  $F_{(1, 195)} = 0.01, p = 0.91$ , Attentional:  $F_{(1, 195)} = 0.04, p = .85$ , Motor:  $F_{(1, 195)} = 0.59, p = .45$ ,  
 1086 nonplanning:  $F_{(1, 195)} = 0.08, p = .78$ ).

1087 Furthermore, we checked whether both the estradiol and placebo group did not differ  
 1088 in pre-existing differences in working memory (Figure S2A, S2B, S2C) in addition to testing  
 1089 whether administration influenced mood (Figure S2D). By doing so we were able to exclude  
 1090 differences in working memory and mood leading to the observed results<sup>26,76</sup>. Separate  
 1091 ANCOVAs for the three subscales (Alertness, Mood, Calmness) of the MDBF revealed no  
 1092 differences in post-administration (Post) scores between the estradiol and placebo group  
 1093 when controlling for baseline scores (Pre) as a covariate (Mood:  $F_{(1, 96)} = 0.30, p = 0.58$ ;  
 1094 Alertness:  $F_{(1, 96)} = 1.35, p = .25$ ; Calmness:  $F_{(1, 96)} = 1.34, p = .25$ ). Similarly, we observed no  
 1095 interaction between group membership and post-administration score (Mood:  $F_{(1, 96)} = 0.06, p$   
 1096  $= .81$ ; Alertness:  $F_{(1, 96)} = 1.88, p = .17$ ; Calmness:  $F_{(1, 96)} = 1.55, p = .22$ ).

1097

1098 **Table S4: Descriptive statistics by treatment (Estradiol, Placebo).**

|               | Group                        |                            | <i>n</i> | statistic [95% CI]              | <i>p</i> |
|---------------|------------------------------|----------------------------|----------|---------------------------------|----------|
|               | Estradiol<br>( <i>n</i> =50) | Placebo<br>( <i>n</i> =50) |          |                                 |          |
| Age (years)   | 25.12 (3.63)                 | 24.6 (3.44)                | 100      | 1381 [-0.99, 1.49] <sup>1</sup> | 0.99     |
| BMI           | 24.54 (2.65)                 | 24.35 (3.08)               | 99       | 1286 [-0.99, 1.99] <sup>1</sup> | 0.99     |
| Height (cm)   | 181.90 (6.88)                | 180.40 (5.95)              | 99       | 1.16 [-1.07, 4.07]              | 0.94     |
| Weight (kg)   | 81.09 (9.66)                 | 79.48 (11.44)              | 99       | 0.76 [-2.61, 5.83]              | 0.99     |
| Visc. Fat (%) | 6.20 (2.48)                  | 6.06 (2.90)                | 98       | 1248 [-0.99, 1.00] <sup>1</sup> | 0.99     |
| Abd. Fat (%)  | 20.66 (5.97)                 | 19.74 (6.32)               | 98       | 0.74 [-1.55, 3.38]              | 0.99     |

---

**BIS/BAS**

---

|             |              |              |     |                      |      |
|-------------|--------------|--------------|-----|----------------------|------|
| BIS         | 17.54 (2.80) | 18.40 (3.68) | 100 | -1.32 [-1.86, -0.25] | 0.88 |
| Drive       | 11.72 (1.77) | 12.12 (2.32) | 100 | 1074.5               | 0.91 |
| Reward      | 11.62 (1.99) | 12.46 (2.04) | 100 | 921 <sup>1</sup>     | 0.18 |
| Fun Seeking | 15.88 (2.00) | 16.08 (2.17) | 100 | -0.48 [-1.03, 0.63]  | 0.99 |

---

1099 Note: Values in cells denote M, parentheses denote SD. The superscript 1 denotes the Mann-Whitney-Wilcoxon  
1100 W value. For the remaining group comparisons, two-tailed independent samples Welch *t*-tests were employed. In  
1101 cases where *n* is not equal to *N* = 100, data was not recorded for that particular variable. p-values are Bonferroni  
1102 corrected.  
1103



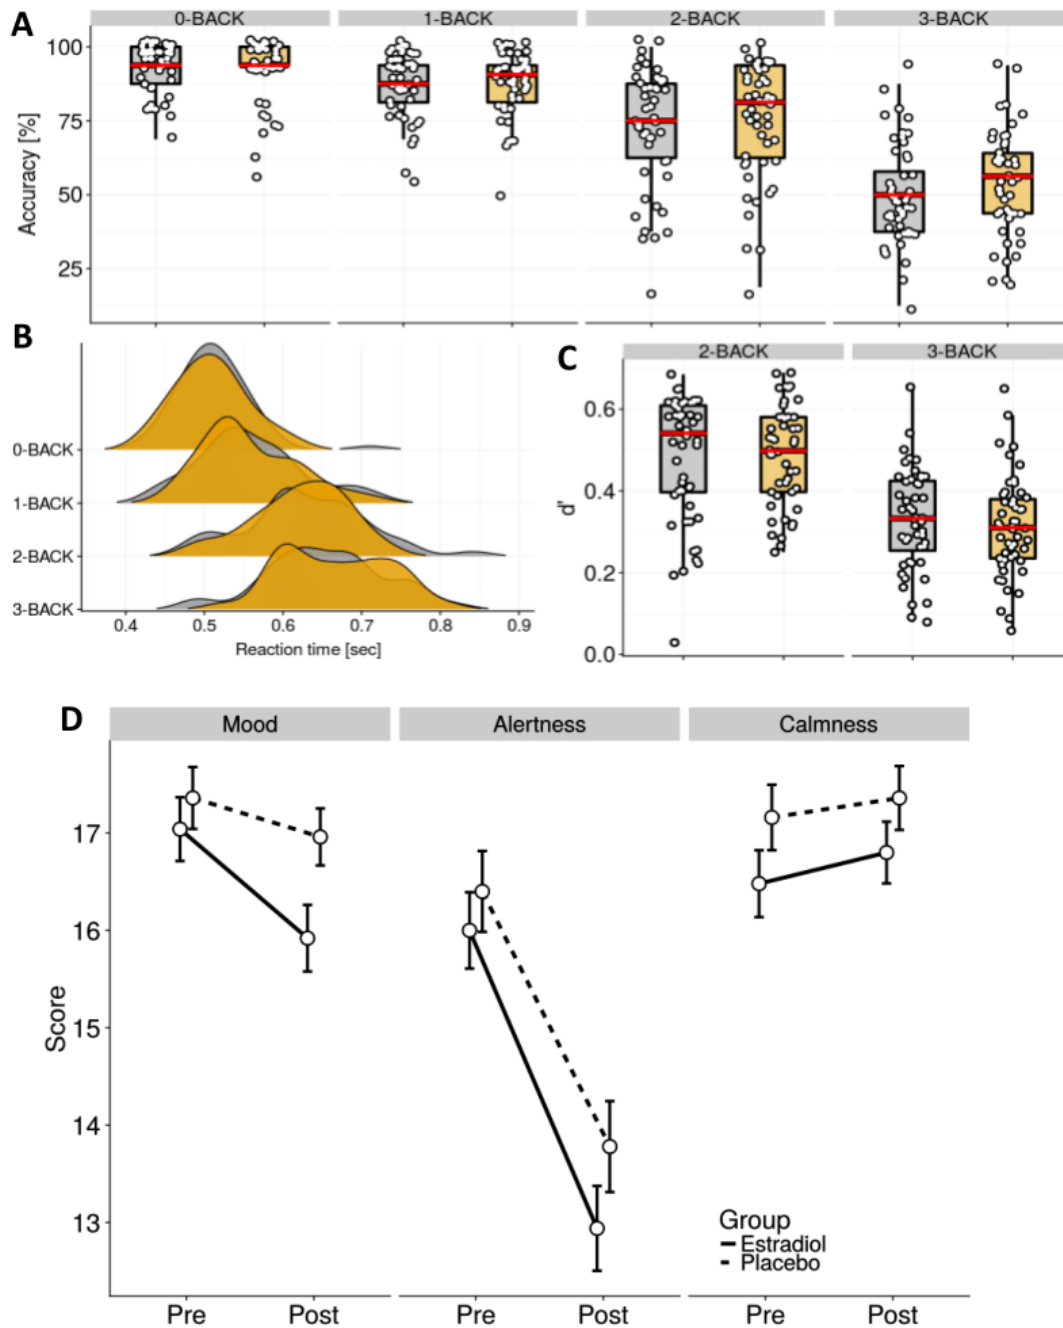

1104  
1105  
1106  
1107  
1108  
1109  
1110  
1111  
1112

**Figure S1.** **A)** Accuracy for individual conditions. The red bar represents the median, the box plot represents the 75% middle most data points, with the whiskers representing 1.95\*IQR. Orange depicts the estradiol and gray the placebo group. That is, they represent the division of subjects according to whether they would subsequently be allocated to the estradiol or placebo group. This color convention is used throughout all figures. **B)** shows density plots for reaction time data for individual conditions. **C)** shows  $d'$  in the most difficult two conditions (2-BACK, 3-BACK) as there were no false alarms in the 0-BACK and 1-BACK, thus accuracy is reduced to  $d'$ . **D)** Average scores prior and post administration for the three subscales of the MDBF.

1113  
1114

1115 Furthermore, our working memory (N-BACK) task revealed a comparable picture for accuracy  
 1116 (Figure S2A), reaction times (Figure S2B), and d-prime (Figure S2C). That is, there was no  
 1117 statistically significant difference between the estradiol and placebo group in accuracy,  
 1118 average reaction times, and d-prime. We did observe an expected drop in performance in  
 1119 terms of decreased accuracy (0-BACK:  $92.94 \pm 9.34$ , 1-BACK:  $88.06 \pm 10.78$ , 2-BACK:  $74.25$   
 1120  $\pm 19.38$ , 3-BACK:  $51.56 \pm 17.37$ ), and d-prime (2-BACK:  $0.48 \pm 0.14$ , 3-BACK:  $0.32 \pm 0.12$ ),  
 1121 and increased reaction times (0-BACK:  $0.51 \pm 0.05$ , 1-BACK:  $0.56 \pm 0.06$ , 2-BACK:  $0.63 \pm$   
 1122  $0.07$ , 3-BACK:  $0.66 \pm 0.07$ ) as the condition became more difficult (i.e. went from 0-BACK to  
 1123 3-BACK). Separate linear models were used to compute to check for main effects of drug ( $F_{(1,$   
 1124  $_{196})} = 2.01$ ,  $p = .16$ ) and an interactive effect of drug and condition on d-prime ( $F_{(1, 196)} = 0.82$ ,  
 1125  $p = .37$ ). As mentioned above, we also did this for accuracy (main effect of drug:  $F_{(1, 392)} = 1.07$ ,  
 1126  $p = .30$ ; drug\*condition interaction:  $F_{(3, 392)} = 2.30$ ,  $p = .08$ ), and reaction times (main effect:  
 1127  $F_{(1, 347)} = 1.31$ ,  $p = .25$ ; drug\*condition interaction:  $F_{(1, 347)} = 0.99$ ,  $p = .39$ ).

1128

1129 **Table S5. Descriptive statistics of MDBF and BIS-11 subscales.**

|               | N   | Pre-administration |              | Post-administration |              |
|---------------|-----|--------------------|--------------|---------------------|--------------|
|               |     | Estradiol          | Placebo      | Estradiol           | Placebo      |
| <b>MDBF</b>   |     |                    |              |                     |              |
| Mood          | 100 | 17.04 (2.31)       | 17.36 (2.25) | 15.92 (2.41)        | 16.96 (2.07) |
| Alertness     | 100 | 16.00 (2.77)       | 16.40 (2.93) | 12.94 (3.08)        | 13.78 (3.30) |
| Calmness      | 100 | 16.48 (2.43)       | 17.16 (2.38) | 16.80 (2.24)        | 17.36 (2.32) |
| <b>BIS-11</b> |     |                    |              |                     |              |
| General       | 100 | 57.86 (7.68)       | 59.28 (7.45) | 59.96 (8.51)        | 60.46 (7.86) |
| Motor         | 100 | 20.76 (3.00)       | 21.78 (3.42) | 22.02 (3.42)        | 22.42 (3.65) |
| Attention     | 100 | 14.34 (3.37)       | 14.14 (2.17) | 15.10 (3.30)        | 14.64 (2.68) |
| Nonplanning   | 100 | 22.76 (3.61)       | 23.36 (4.29) | 22.84 (4.05)        | 23.40 (4.21) |

1130 Note: values in cells denote *M*, values in parentheses denote *SD*.

1131

1132 We observed no correlation between the certainty in the subjects' belief as to whether  
 1133 they had received the drug or placebo ( $r = 0.02$ ,  $p = .82$ ), or between the reported observed  
 1134 changes and actually receiving estradiol ( $r = -0.08$ ,  $p = .42$ ). This shows that our double-blind  
 1135 procedure was successful, and that our placebo gel preparation was indistinguishable from  
 1136 the actual drug.

1137 **Table S6. Frequencies of individual polymorphisms of DAT and COMT genes.**

| Polymorphism | Group     | N  |
|--------------|-----------|----|
| 9/10         | Estradiol | 18 |
| 9/10         | Placebo   | 16 |
| 10/10        | Estradiol | 21 |
| 10/10        | Placebo   | 26 |
| Val/Val      | Estradiol | 11 |
| Val/Val      | Placebo   | 9  |
| Met/Val      | Estradiol | 23 |
| Met/Val      | Placebo   | 26 |
| Met/Met      | Estradiol | 12 |
| Met/Met      | Placebo   | 15 |

1138 Note: the split according to both COMT and DAT does not sum to 100 because for a few subjects it was not possible  
1139 to determine their polymorphism.

1140

1141

1142 **Reinforcement learning task**

1143 **The role of CYP 19A1, ER $\alpha$ , ER $\beta$ , CAG, and GGN**

1144 Because the results for accuracy, staying, and switching behaviour that we report in the  
1145 manuscript could also be moderated through other candidate mechanisms, we further  
1146 analysed these candidate mechanisms together by providing theoretical motivation for the  
1147 analyses. Here, we first briefly outline their importance and then summarize the observed  
1148 results.

1149 It is known that androgens are converted to estrogen<sup>77</sup>. This means that the increase  
1150 in estrogen levels arises from this conversion process and the administration more directly.  
1151 Furthermore, variation in the length of two functional polymorphisms (CAG – polyglutamine,  
1152 and GGN – polyglycine) are known to modulate the functioning of the androgen receptor gene  
1153<sup>78</sup>. This is important for two reasons. First, our procedure has previously shown to increase  
1154 circulating testosterone levels which could have raised estradiol levels whilst being moderated  
1155 by subjects' androgen receptor characteristics<sup>38</sup>. Following from this, previous work has  
1156 shown that brain regions important for memory and learning contain androgen receptors<sup>79</sup>.

1157 Therefore, it could be possible that interindividual differences in both functional polymorphisms  
1158 could have moderated our observed results due to interindividual variability. For example,  
1159 greater CAG repeat length has previously been associated with lower scores in different  
1160 cognitive tests in older men <sup>78</sup>, and GGN repeat length has been associated with immediate  
1161 and delayed logical memory recall in women <sup>80</sup>. The described results show a correlation  
1162 between individual variability in androgen receptor functioning and cognitive performance,  
1163 giving rise to the possibility that CAG and GGN polymorphisms being potential candidate  
1164 mechanisms moderating the observed effect of estradiol.

1165         Throughout the conversion process from androgens to estrogens, the CYP19A1 gene  
1166 encodes instructions for aromatase – the enzyme converting androgens to estrogens <sup>81</sup>. The  
1167 single nucleotide polymorphisms (SNPs) associated with the CYP19A1 gene regulate the  
1168 metabolism of androgens and mediate brain estrogen activity. Two specific SNPs (rs700518,  
1169 rs936306) have been previously shown to have a role in cognitive functioning in humans. For  
1170 example, men with the homozygous AA allele have higher estradiol serum levels and greater  
1171 bilateral posterior hippocampal gray matter volume compared to men with the homozygous  
1172 GG allele <sup>82</sup>. While other work has shown a differential impact of homozygous CC alleles  
1173 versus homozygous TT alleles on episodic memory recall in women <sup>83</sup>. Given that our  
1174 procedure has previously shown to increase circulating testosterone levels and that  
1175 polymorphisms of the CYP19A1 gene are known to have a role in cognitive functioning, we  
1176 aimed to exclude the possibility that this may have driven our observed effects, and analysed  
1177 both single nucleotide polymorphisms of the CYP19A1 gene.

1178         Once androgens are converted to estrogens, estrogen action is mediated through the  
1179 estrogen receptors (ER $\alpha$ , ER $\beta$ ). Both receptors are widely distributed throughout the brain,  
1180 including regions of importance for cognitive functioning and reward processing <sup>84</sup>. So far, it  
1181 has been shown that ER $\alpha$  is responsible for most of estrogen-related activation. For example,  
1182 it has been shown that SNPs of ER $\alpha$  are related to Alzheimer's disease and are associated  
1183 with the likelihood of developing cognitive impairment <sup>85</sup>. We have, therefore, focussed on two  
1184 particular SNPs of ER $\alpha$ : rs9340799, rs2234693. In contrast, little is known of a potential impact

1185 of ER $\beta$ . As an exploratory measure, we have included repeats of this receptor in our analysis  
1186 as well.

1187 Of the described candidates (CAG, GGN, CYP 19A1, ER $\alpha$ , ER $\beta$ ), no test revealed any  
1188 effect of interest. There was no interaction between drug group (i.e. estradiol or placebo) and  
1189 either the SNPs of ER $\alpha$ : rs9340799 ( $F_{(2, 84)} = 0.66, p = .52$ ), rs2234693 ( $F_{(2, 84)} = 0.63, p = .53$ )  
1190 in relation to accuracy. Furthermore, the same was true for the interaction between CAG  
1191 repeats and drug group ( $F_{(1, 87)} = 0.45, p = .51$ ), GGN repeats and drug group ( $F_{(1, 87)} = 1.31, p$   
1192  $= .26$ ), and SNPs of the CYP19A1 gene and drug group (rs700518  $F_{(2, 84)} = 1.84, p = .15$ ,  
1193 rs936306  $F_{(2, 84)} = 0.34, p = .72$ ). In a final examination, we also looked at the repeats of ER $\beta$   
1194 to determine whether this could have driven any of the observed effects. However, this was  
1195 not the case for either recorded variant of ER $\beta$  (ER $\beta$ 1:  $F_{(1, 87)} = 0.02, p = .89$ , ER $\beta$ 2:  $F_{(1, 87)} =$   
1196  $0.00, p = .96$ ).

1197 Identical results were obtained for switching behaviour. While we observed a  
1198 statistically significant interaction between estradiol administration and the COMT  
1199 polymorphism (see next section), this was not true for any of the other mechanistic  
1200 explanations. That is, no model showed an interaction between drug group and either of the  
1201 SNPs of ER $\alpha$ : rs9340799 ( $F_{(2, 84)} = 2.90, p = .06$ ), rs2234693 ( $F_{(2, 84)} = 2.88, p = .06$ ), CAG  
1202 repeats ( $F_{(1, 87)} = 0.10, p = .76$ ), GGN repeats  $F_{(1, 87)} = 1.32, p = .25$ ), and SNPs of the CYP19A1  
1203 gene (rs700518  $F_{(2, 84)} = 1.81, p = .17$ , rs936306  $F_{(2, 84)} = 1.08, p = .35$ ) in relation to switching  
1204 behaviour. As in the case of accuracy, we also looked at the repeats of ER $\beta$ . Again, there was  
1205 no statistically significant contribution to switching behaviour from this predictor for either  
1206 recorded variant of ER $\beta$  (ER $\beta$ 1:  $F_{(1, 87)} = 3.05, p = .08$ ; ER $\beta$ 2:  $F_{(1, 87)} = 0.96, p = .33$ ).

1207 We finally repeated the set of analyses for staying behaviour with no effects found of  
1208 any of these variables: SNPs of ER $\alpha$ : rs9340799 ( $F_{(2, 84)} = 1.69, p = .19$ ), rs2234693 ( $F_{(2, 84)} =$   
1209  $1.79, p = .17$ ), CAG repeats ( $F_{(1, 87)} = 0.38, p = .54$ ), GGN repeats  $F_{(1, 87)} = 0.30, p = .59$ ), SNPs  
1210 of the CYP19A1 gene (rs700518  $F_{(2, 84)} = 1.27, p = .29$ , rs936306  $F_{(2, 84)} = 0.59, p = .55$ ), and  
1211 variant of ER $\beta$  (ER $\beta$ 1:  $F_{(1, 87)} = 1.35, p = .25$ ; ER $\beta$ 2:  $F_{(1, 87)} = 0.86, p = .36$ ).

1212 In brief, we have shown that the effects related to accuracy, switching, and staying  
1213 reported in the manuscript did not depend on (1) the overall androgen receptor functioning  
1214 assessed by CAG and GGN repeat polymorphisms, (2) interindividual variability in the  
1215 androgen-to-estrogen conversion process via the CYP19A1 gene polymorphism, and (3)  
1216 estrogen receptor polymorphisms (ER $\alpha$ ) or repeats (ER $\beta$ ).

1217

1218 **The effect of estradiol administration on choice behaviour is moderated by**  
1219 **polymorphisms of both COMT and DAT1**

1220 We directly tested whether the effect of estradiol on choice behaviour is moderated by  
1221 polymorphisms of dopamine-related genes (e.g. COMT, DAT1) by using generalized linear  
1222 mixed models. We specifically tested whether the interaction between drug, polymorphism  
1223 (COMT or DAT1), and trial are a significant predictor of the options they would choose.

1224 Based on the inverted U-shape dopamine hypothesis<sup>46</sup>, we predicted that estradiol  
1225 administration would upregulate reward sensitivity in subjects with low prefrontal dopaminergic  
1226 activity (i.e. Val/Val) but would not, or would even impair it, in those with high prefrontal  
1227 dopaminergic activity (i.e. Met/Met). The model predictions support this hypothesis as it  
1228 predicted that subjects with a Met/Val ( $\beta = 0.20 \pm 0.04$ , 95% CI [0.11, 0.28],  $z = 4.56$ ,  $p < .001$ )  
1229 and Val/Val genotype ( $\beta = 0.37 \pm 0.06$ , 95% CI [0.26, 0.48],  $z = 6.99$ ,  $p < .001$ ) were more  
1230 likely to select option A as trials progressed when they received estradiol (Fig. S2, S4). Option  
1231 A was the more rewarding option throughout the task (percent trials rewarded:  $M_{\text{optionA}} =$   
1232 53.70%,  $M_{\text{optionB}} = 42.91\%$ ).

1233 Based on the prediction that estradiol indirectly increases striatal dopamine levels,  
1234 leading to higher reward prediction errors, we expected that subjects with the 9/10 genotype  
1235 (i.e. high striatal dopamine) would select the higher value option more often, while this would  
1236 be less often true for subjects with the 10/10 genotype (i.e. low striatal dopamine). This  
1237 prediction was supported by the model showing that subjects with the 10/10 genotype with

1238 placebo ( $\beta = -0.12 \pm 0.04$ , 95% CI [-0.04, -0.20],  $z = -3.03$ ,  $p < .01$ ) were the most likely to  
1239 select the lower valued option A throughout task progression, while estradiol administration  
1240 dampened this slope in subjects with the same 10/10 genotype (Fig. S4). Results from both  
1241 generalized linear mixed effects models showed that once individual variation was considered,  
1242 the effect of estradiol administration on choice behaviour across trials was moderated by  
1243 striatal (DAT1) and prefrontal (COMT) polymorphisms.

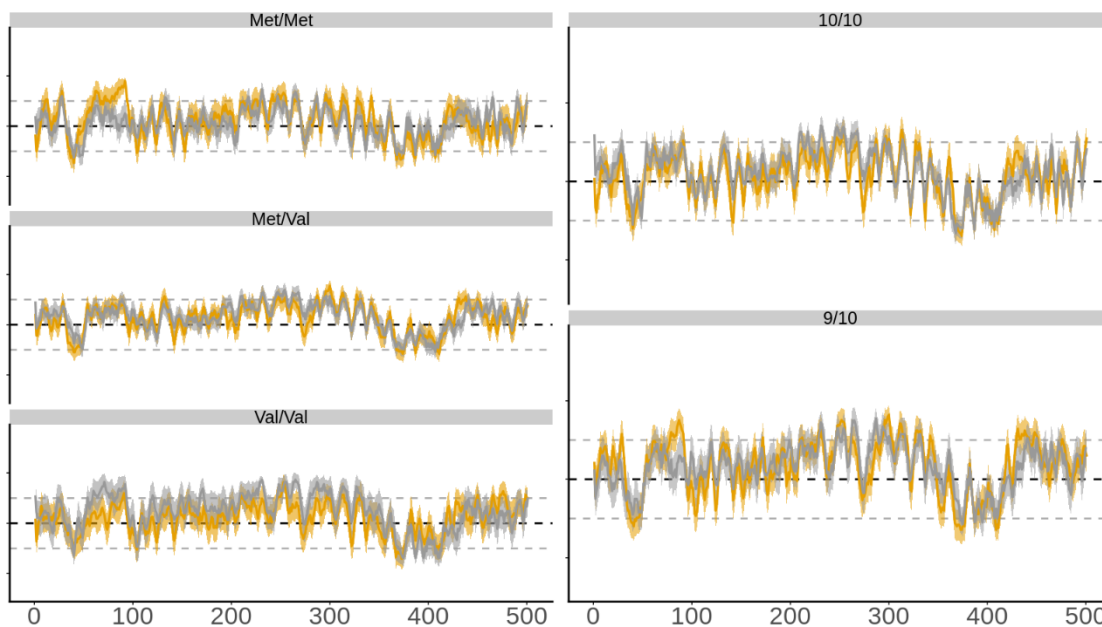

1244  
1245 **Figure S2.** Relative choice probability for choosing option A (top of y-axis) vs. choosing stimulus 1 (bottom of y-axis) for the placebo (gray) and estradiol (orange) group split according to both polymorphisms assessed in the  
1246 main text: COMT (left panel), DAT (right panel) across trials (1-500). Thick lines represent trial means, shaded  
1247 areas denote standard error of the means. The blue line in the background denotes the empirical relative reward  
1248 probability which was computed from the probability of stimulus two being rewarding (top of y-axis) - stimulus one  
1249 being rewarding (bottom of y-axis). Gray dotted lines represent where subjects were on average 25% more likely  
1250 to select option A (upper line) or stimulus 1 (lower line). All time-series traces are smoothed with a 5-trial  
1251 moving average for visual purposes.  
1252  
1253

1254 Figure S2 reveals a differential effect of estradiol administration on choice behaviour  
1255 that depends on polymorphisms of both COMT and DAT. In the case of the COMT  
1256 polymorphism this is most clearly visible in the lower left panel. The panel shows that placebo  
1257 Val/Val subjects exhibited a clear tendency towards option A until trial ~370. After this, they  
1258 did not reverse back towards choosing it more often despite option A being more rewarding  
1259 from trial ~420 onwards. This is in contrast with results for subjects with other polymorphisms  
1260 of COMT and results when subjects were split according to the DAT1 polymorphism. Estradiol

1261 Met/Met subjects exhibited choice behaviour more aligned with the reward probability  
1262 distribution in the beginning at trial ~80 compared to subjects from the placebo group with the  
1263 same polymorphism. When we then split subjects according DAT1 polymorphism, the  
1264 estradiol 9/10 subjects can similarly be seen following the reward probability distribution more  
1265 closely compared to the placebo 9/10.

1266 Because of the results above and because estradiol administration likely results in  
1267 increased prefrontal dopamine levels through downregulating COMT enzyme activity<sup>56</sup> we  
1268 predicted that the interaction between estradiol administration and COMT polymorphism  
1269 would be predictive of switching behaviour<sup>24</sup>. As a measure of switching, we assessed the  
1270 number of times the option chosen on trial  $t$  was different from the one chosen at trial  $n + 1$   
1271 (i.e. a switch), irrespective of the choice outcome on trial  $t$ . Estradiol administration did not  
1272 significantly influence switch decisions ( $M = 162.12 \pm 56.31$ ) compared to placebo ( $M = 168.82$   
1273  $\pm 68.13$ ). However, we observed a significant interaction of estradiol administration by COMT  
1274 genotype ( $F_{(2, 80)} = 3.22, p = .05, \Omega^2 = 0.04$ , Fig. S3). The interaction showed that subjects with  
1275 placebo and a Val/Val genotype (i.e. low prefrontal dopamine availability) switched less often  
1276 ( $\beta = -84.07 \pm 33.69, p = .02$ ) compared to all other groups. As predicted by the inverted U-  
1277 shaped relationship between prefrontal dopamine levels and behaviour, Val/Val placebo  
1278 subjects (Val/Val:  $M = 132.33 \pm 61.40$ ) switched less compared to Met/Met placebo subjects  
1279 (i.e. associated with high prefrontal dopamine availability; Met/Met:  $M = 204.27 \pm 53.52, t_{(15,10)}$   
1280  $= 2.91, 95\% CI [19.25, 124.54], p = .01, d = 1.46$ ). For the estradiol group, this difference was  
1281 not present (Val/Val:  $M = 151.09 \pm 70.85$ ; Met/Met:  $M = 178.5 \pm 55.34; t_{(18,96)} = 1.03, 95\% CI [-$   
1282  $28.28, 83.10], p = .32, d = 0.44$ ). In other words, estradiol administration attenuated naturally  
1283 occurring differences in switching behaviour found in subjects with the Met/Met and Val/Val  
1284 genotypes that are associated with high and low prefrontal dopamine levels, respectively.



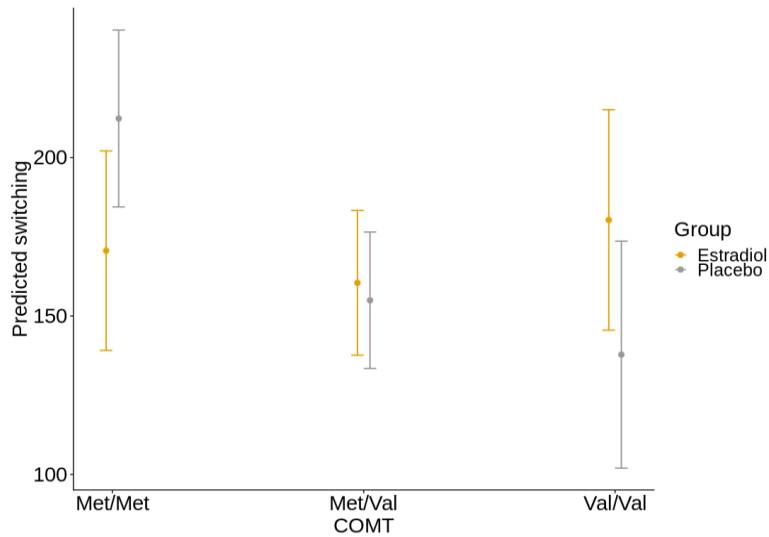

1285

1286 **Figure S3.** General linear model prediction for switching behaviour (i.e. a change in chosen stimulus on trial  $t + 1$   
1287 from trial  $t$ , independent of choice outcome on trial  $t$ ). Estradiol administration dampened naturally occurring  
1288 differences in switching behaviour when subjects were split according to the COMT polymorphism, i.e. whether  
1289 subjects would switch the stimulus they chose on trial  $t$  compared to trial  $t + 1$  irrespective of choice outcome on  
1290 trial  $t$ . Error bars represent SEM.

1291

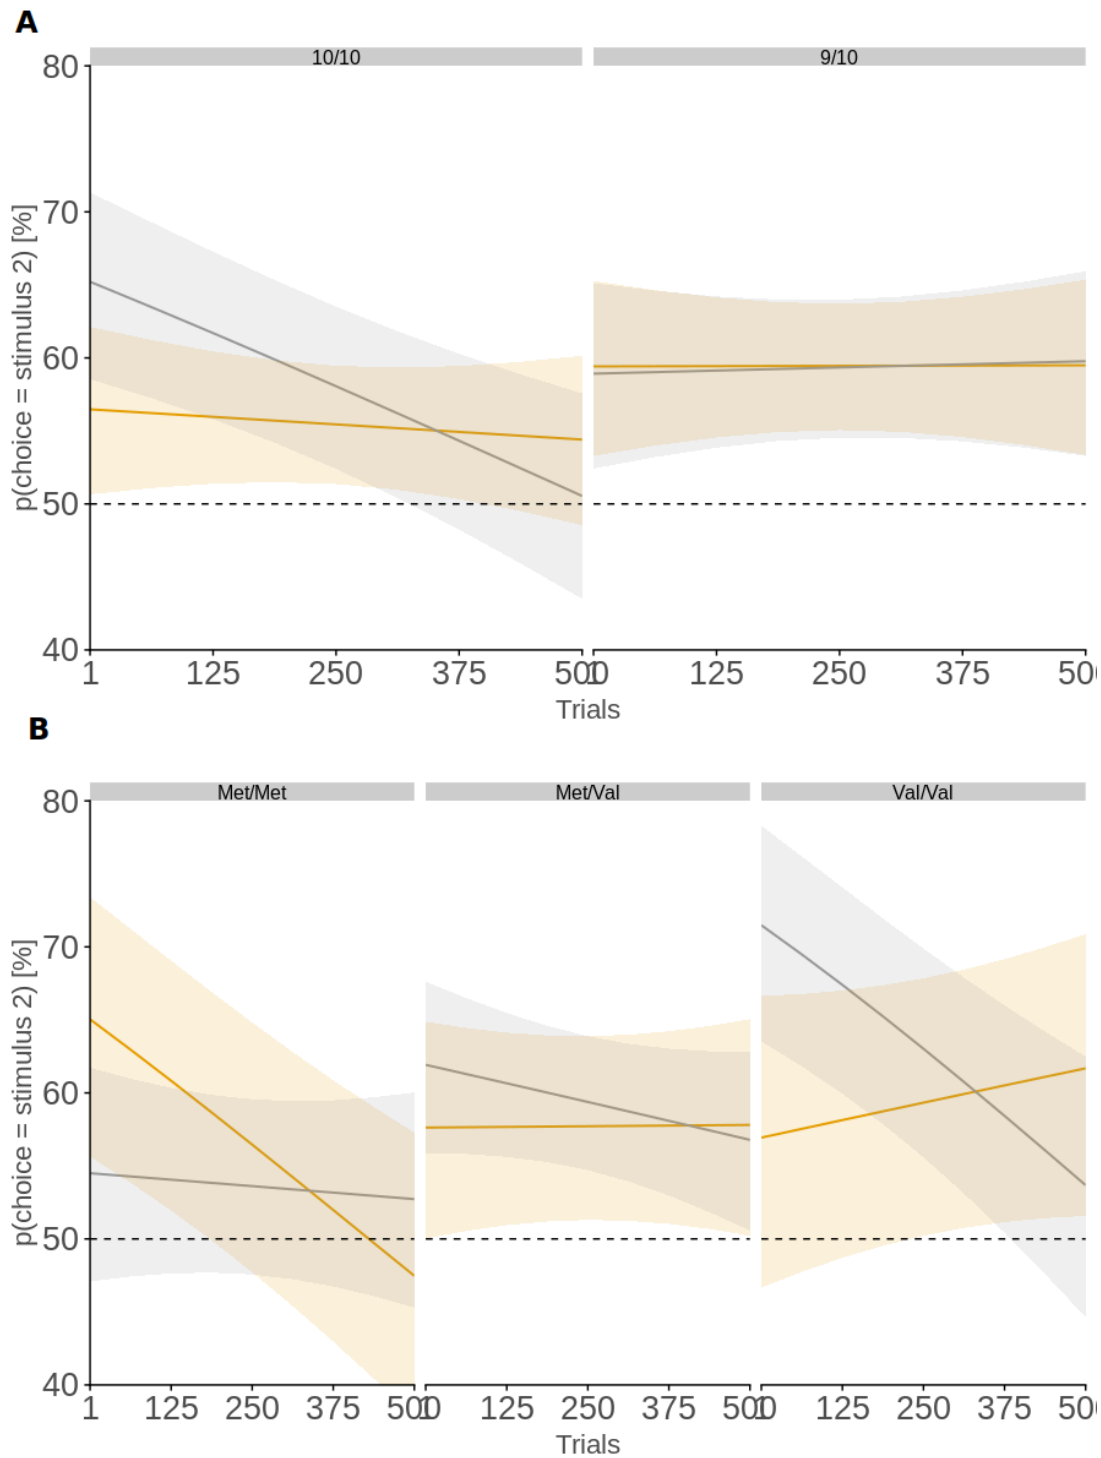

1292  
1293  
1294  
1295

**Figure S4.** Predictions from winning models of the generalized linear mixed effects models for **A)** the interaction between drug, DAT, and trial on choice, and **B)** the interaction between drug, COMT, and trial on choice.

1296  
1297  
1298  
1299

1300 **Formal model comparison**

1301 We estimated parameters by fitting several Q-learning models. The best model (model 6,  
1302 leave one out information criterion (LOOIC) = 58888, Fig. S5A) included separate learning  
1303 rates for positive and negative prediction errors, a temperature parameter, and an irreducible  
1304 noise parameter. The model predicted choice behaviour above chance ( $t_{(99)} = 13.95$ , 95% CI  
1305 [0.64, 0.68],  $p < .001$ , Fig. S5B) and performed equally well for both groups ( $M_{\text{Estradiol}} = 66.26$   
1306 %  $\pm 10.77$ ,  $M_{\text{Placebo}} = 64.90$  %  $\pm 11.85$ ;  $t_{(97.115)} = 0.76$ , 95% CI [-0.03, 0.06],  $p = .45$ ).

1307

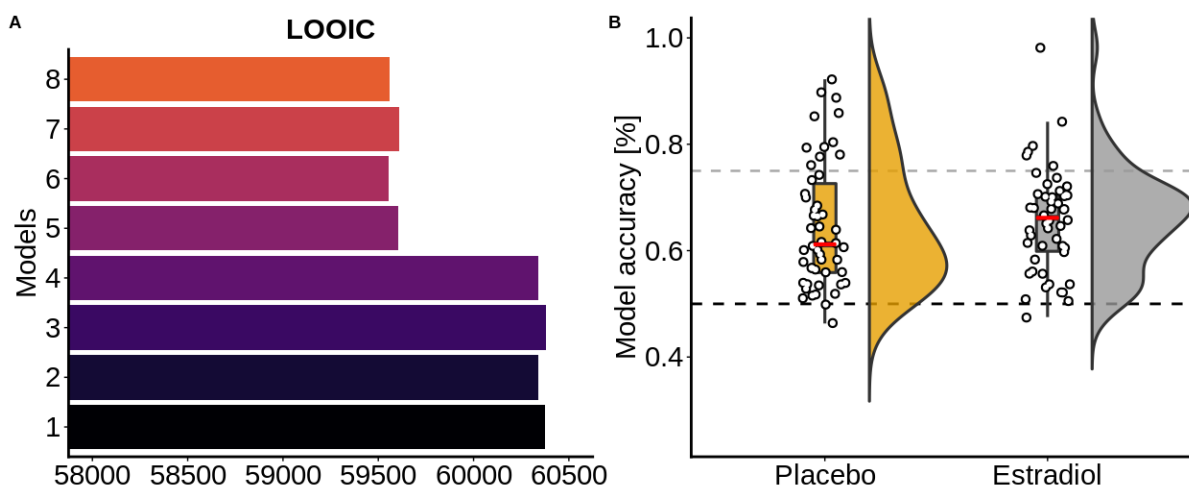

1308

1309 **Figure S5. A)** Leave one out information criterion (LOOIC) value for all employed models. Lower LOOIC indicates  
1310 better model fit – model two was selected as the best model. **B)** The overall model accuracy collapsed over time  
1311 obtained from the posterior predictive density shown for both drug groups separately.  
1312

1313 In addition to computing the leave-one-out information criterion to perform model  
1314 comparison<sup>73</sup> we similarly computed the exceedance probability of the winning model using  
1315 the VBA toolbox<sup>75</sup>. This value showed a strong preference for the winning model  $P(\text{model}$   
1316  $\text{two}) = 98\%$ . Furthermore, we computed protected exceedance probability<sup>74</sup> as an extension  
1317 which, while yielding an expected decrease in the winning model probability, still favoured  
1318 model two over other competing models ( $P(\text{model two}) = 12.5\%$ ). The likely decrease was due  
1319 to the reinforcement learning task not being optimized to detect behavioural differences  
1320 between the models tested. However, in all reported models, the latent variable of interest, i.e.  
1321 the learning rate, remained unaltered. We would therefore expect the increase in learning

1322 rates to be present if we were to select the learning rates from models that best fit individual  
1323 subjects.

### 1324 **Validating model**

1325 We further tested the model validity and predictions by computing posterior predictive  
1326 densities, i.e. what predictions does the model make on a trial-by-trial basis for subjects with  
1327 the parameters such as those that were extracted from our subjects. Posterior predictive  
1328 densities showed no difference in a fit between both the estradiol and placebo group and  
1329 approximated the empirical reward probability distribution (Fig. S6A). To quantify this, we then  
1330 compared model predictions from posterior predictive densities with actual subject behaviour  
1331 to assess model accuracy collapsed across time (Fig. S6B) showing it performed above  
1332 chance and equally well for both groups. We further compared accuracy on each trial across  
1333 subjects to ensure that there were no unexpected drops in accuracy. This did not happen as  
1334 the model (Fig. S6B) had no discernible drops in performance. We also performed parameter  
1335 recovery on the winning model where we used the maximum a posteriori estimates reported  
1336 in the manuscript, generated data for synthetic subjects, performed parameter estimation on  
1337 the synthetic data, and correlated the newly obtained synthetic parameters with original  
1338 parameters for each subject. This procedure showed that both original and recovered learning  
1339 rates correlated with one another (negative:  $r = 0.33$ ,  $p < .001$ , positive:  $r = -0.34$ ,  $p < .001$ ).

1340

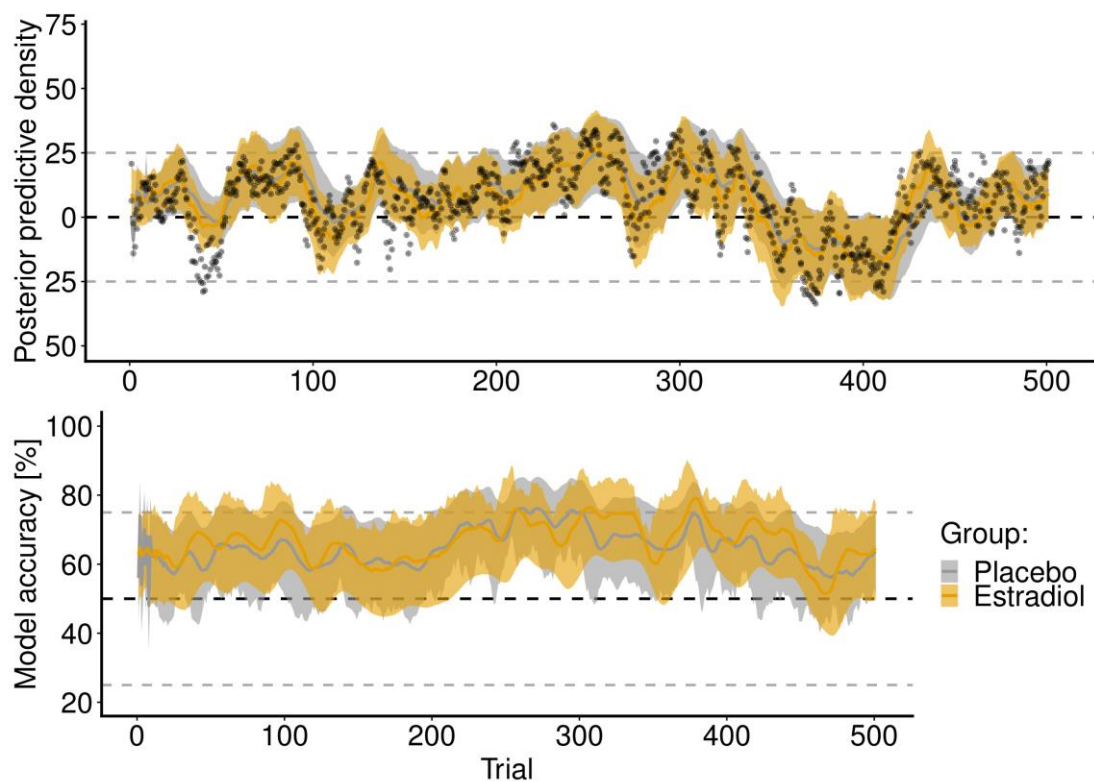

1341

1342 **Figure S6. A)** Posterior predictive density computed for both drug groups with overlaid average responses for both  
1343 drug groups across trials **B)** Accuracy for both drug groups obtained from the posterior predictive density for both  
1344 drug groups separately.  
1345

1346

1347

1348

1349

1350

1351

1352

1353

1354

1355

1356

1357

1358

1359

1360

1361

1362

1363

1364

1365

1366
